# Supplementary material for: Improved performance of perovskite solar cells by fine-tuning dibenzofuran-based hole transporting materials
Source: Royal Society of Chemistry journal article supplement (doi:10.1039/d4tc03167a), 2024-01-01
Supplement: d4tc03167a1.pdf [file d4tc03167a1.pdf]

## Supporting Information

### Improved performance of perovskite solar cells by fine-tuning dibenzofuran-based hole transporting materials

*Xuepeng Liu<sup>a</sup>, Xianfu Zhang<sup>a</sup>, Mingyuan Han<sup>a</sup>, Jianlin Chen<sup>a</sup>, Ghadari Rahim<sup>b</sup>,  
Yongpeng Liang<sup>a</sup>, Botong Li<sup>a</sup>, Songyuan Dai<sup>a\*</sup>*

*<sup>a</sup>Beijing Key Laboratory of Novel Thin-Film Solar Cells, School of New Energy, North China Electric Power University, Beijing 102206, China*

*<sup>b</sup>Computational Chemistry Laboratory, Department of Organic and Biochemistry, Faculty of Chemistry, University of Tabriz, Tabriz, 5166616471, Iran.*

E-mail: sydai@ncepu.edu.cn

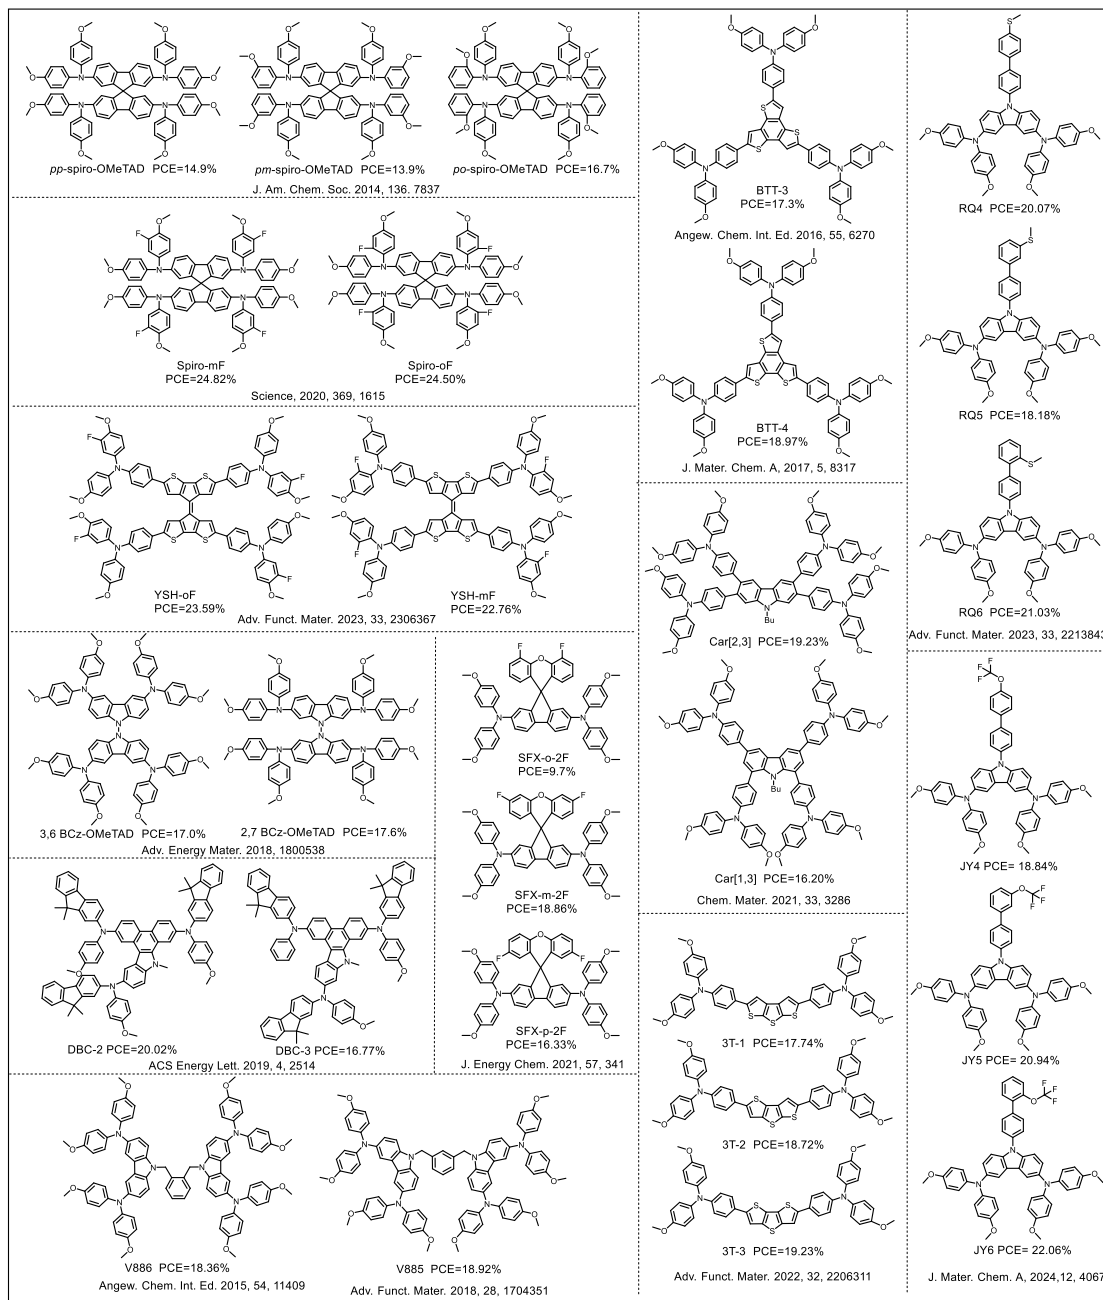

**Fig. S1** Brief summary of the reported isomeric HTMs and the device efficiency in PSCs.

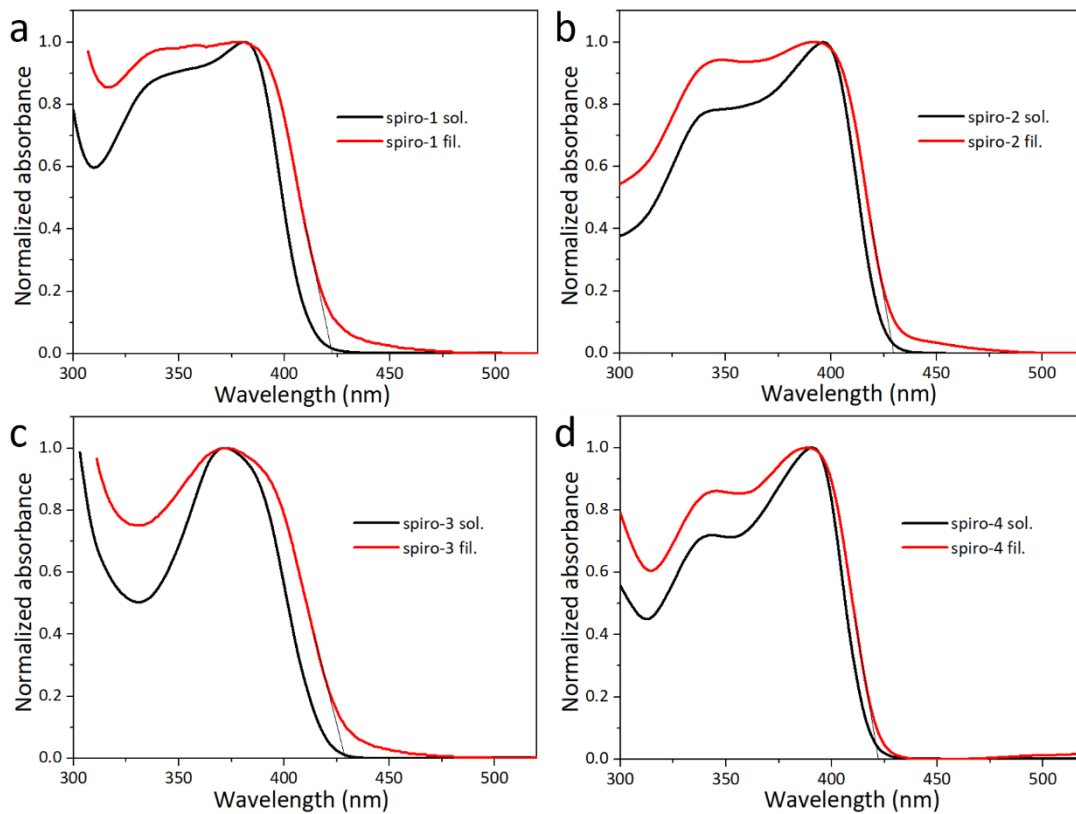

**Fig. S2** UV-vis absorption spectra of spiro-2, spiro-3, spiro-4 and spiro-1 in dilute dichloromethane solution and thin film state.

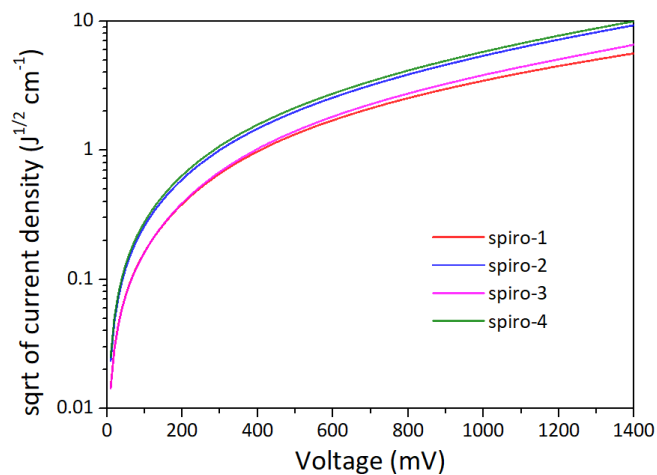

**Fig. S3** SCLC  $J$ - $V$  characteristics of different HTM-based hole-only devices

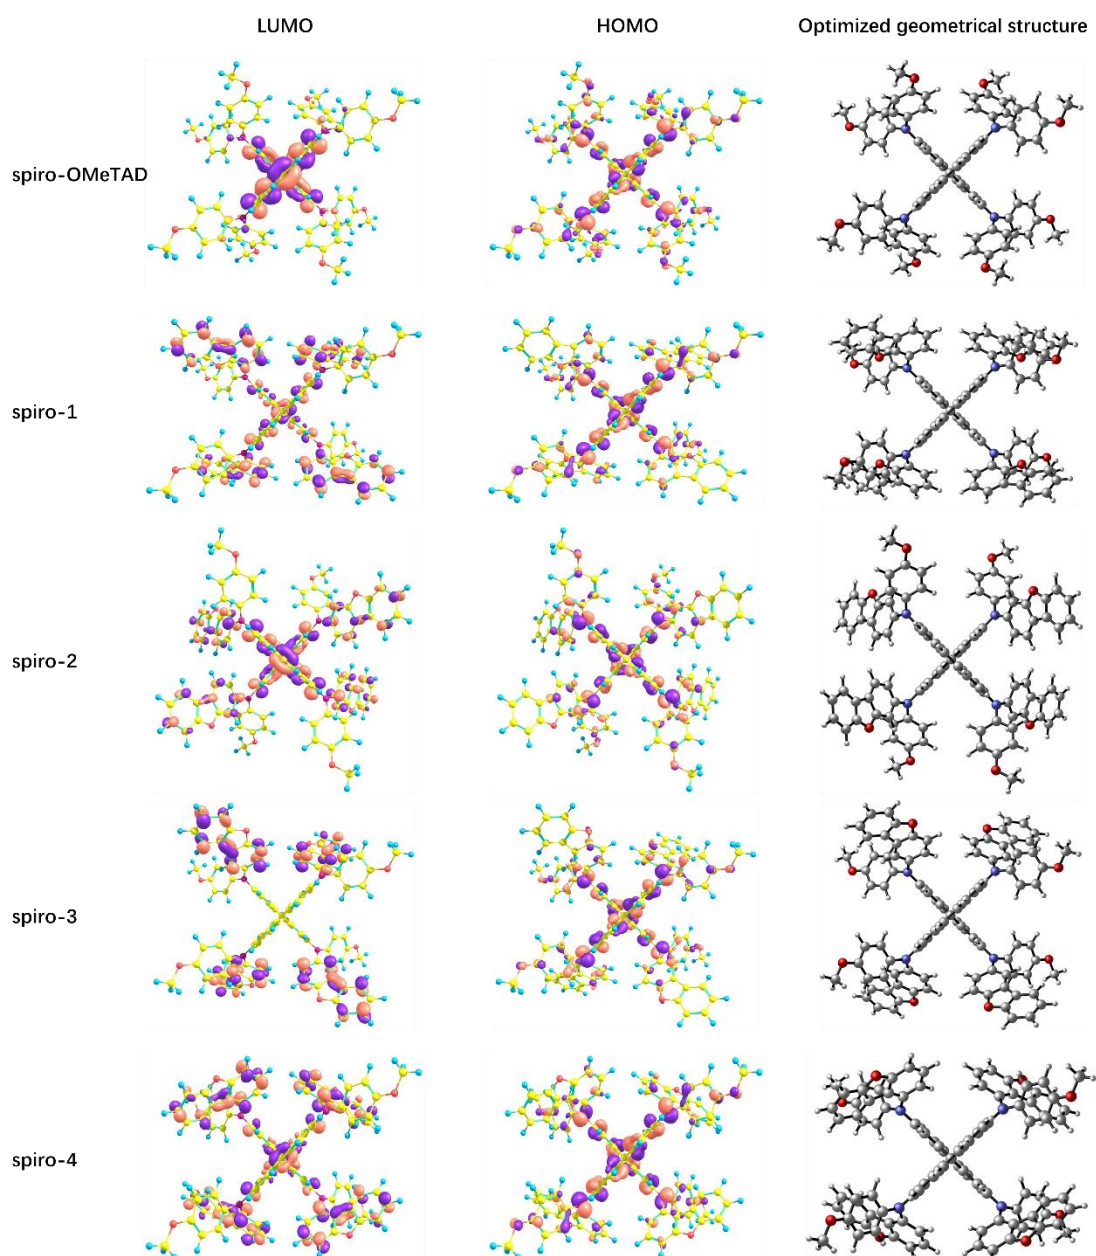

**Fig. S4** Frontier molecular orbital distributions and optimized geometrical structures, of the investigated molecules.

**Table S1** Summary of molecular properties and device performance for the reported similar reported molecules compared with our studied HTMs. The blue bond on the structure illustrate the structural difference with spiro-OMeTAD.

| designatio<br>n | Molecular structure | HOMO<br>level<br>(eV) and<br>PCE of<br>the | HOMO<br>level and<br>PCE of<br>spiro-<br>OMeTAD | Reduction<br>value of<br>HOMO<br>compared<br>with | T <sub>g</sub> (°C) | Reference |
|-----------------|---------------------|--------------------------------------------|-------------------------------------------------|---------------------------------------------------|---------------------|-----------|
|                 |                     |                                            |                                                 |                                                   |                     |           |

|                             |                                                                                     | studied<br>HTM             | in the<br>work             | spiro-<br>OMeTAD |                  |                                            |
|-----------------------------|-------------------------------------------------------------------------------------|----------------------------|----------------------------|------------------|------------------|--------------------------------------------|
| <b>po-spiro-<br/>OMeTAD</b> | 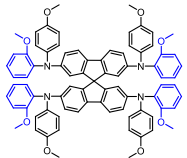   | -5.31 eV<br>16.7%          | -5.22 eV<br>15.2%          | 0.09 eV          | -                | J. Am. Chem. Soc., 2014, 136, 7837         |
| <b>DM</b>                   |    | -5.27 eV<br>23.2%          | -5.22 eV<br>21.3%          | 0.05 eV          | 161              | Nat. Energy, 2018, 3, 682                  |
| <b>Spiro-mF</b>             |    | -5.19 eV<br>24.82%         | -4.97 eV<br>23.44%         | 0.22 eV          | 120 <sup>a</sup> | Science, 2020, 369, 1615                   |
| <b>SC</b>                   |    | -5.26 eV<br>21.78%         | -5.22 eV<br>20.73%         | 0.04 eV          | 164              | Chem. Mater., 2021, 33, 285                |
| <b>spiro-<br/>Naph</b>      |   | -5.05 eV<br>24.43%         | -5.01 eV<br>23.95%         | 0.04 eV          | 147              | Nat. Photon., 2022, 16, 119                |
| <b>Spiro-<br/>4TFEAD</b>    |  | -5.25 eV<br>21.11%         | -5.15 eV<br>20.44%         | 0.10 eV          | 140              | Solar RRL, 2022, 6, 2100944                |
| <b>DP</b>                   |  | -5.18 eV<br>25.24%         | -5.10 eV<br>24.34%         | 0.09 eV          | 149              | Angew. Chem. Int. Ed. 2023, 62, e202304350 |
| <b>SF-MPA-<br/>MCz</b>      |  | -5.26 eV<br>24.53%         | -5.13 eV<br>22.95%         | 0.13 eV          | 154              | Research, 2024, 7, 0332                    |
| <b>spiro-4</b>              |  | <b>-5.29 eV<br/>23.38%</b> | <b>-5.10 eV<br/>22.10%</b> | <b>0.19 eV</b>   | <b>163</b>       | <b>This work</b>                           |

<sup>a</sup> T<sub>g</sub> value of Spiro-mF is measured by ourself (which is not reported in published work, Science, 2020, 369, 1615), as illustrated in Fig. S5, and Spiro-mF is synthesized in our lab.

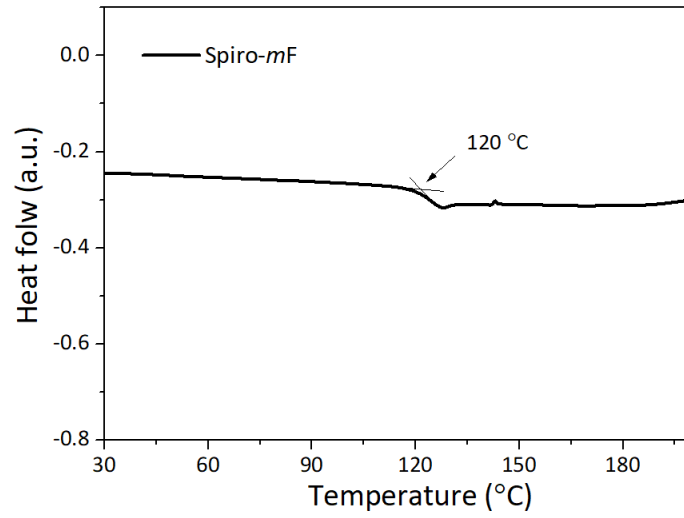

**Fig. S5** DSC measurement of Spiro-*m*F.

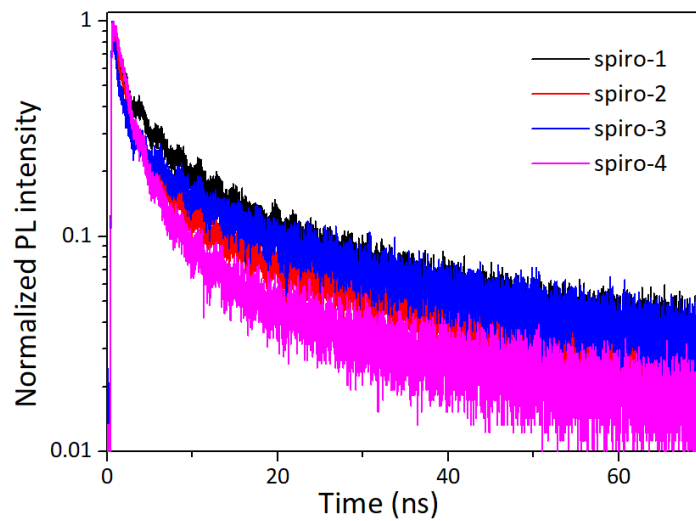

**Fig. S6** Time-resolved photoluminescence spectra of pristine perovskite films, or coated with various HTMs

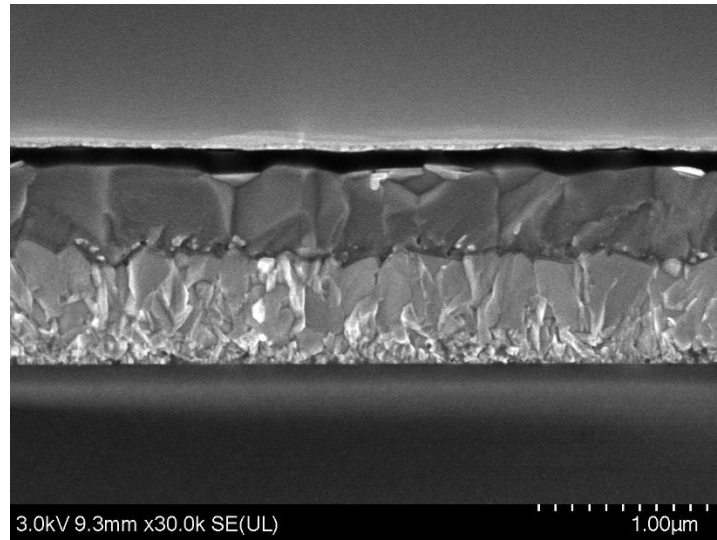

**Fig. S7** Cross-sectional scanning electron microscopy of a representative device.

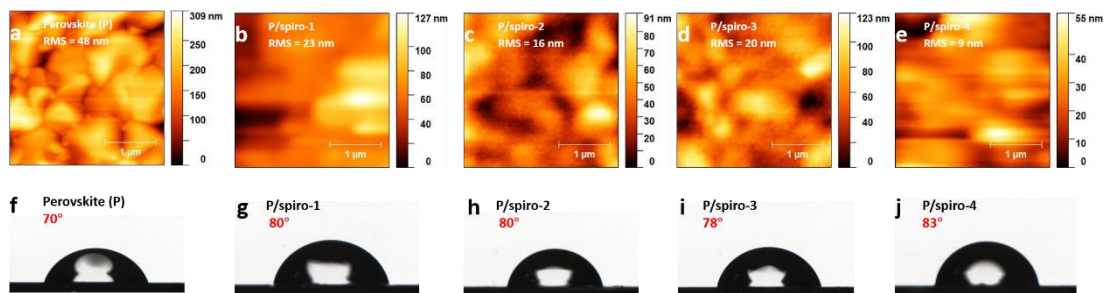

**Fig. S8** (a-e) AFM images and (f-j) contact-angle measurements of the perovskite layer or perovskite deposited with different HTMs.

**Table S2** Mean values with standard deviation (STDEV) of photovoltaic parameters (reverse scan direction) of PSCs with different HTMs, the average values were derived from 16 devices.

| HTM          | $V_{oc}$ (V) | $J_{sc}$ ( $\text{mA cm}^{-2}$ ) | FF (%)     | PCE (%)    |
|--------------|--------------|----------------------------------|------------|------------|
| spiro-1      | 1.10±0.02    | 24.76±0.05                       | 69.69±1.20 | 19.04±0.47 |
| spiro-2      | 1.14±0.01    | 24.65±0.07                       | 77.44±1.36 | 21.69±0.51 |
| spiro-3      | 1.11±0.02    | 24.83±0.07                       | 74.13±0.81 | 20.36±0.45 |
| spiro-4      | 1.15±0.01    | 24.92±0.05                       | 78.25±1.34 | 22.49±0.51 |
| spiro-OMeTAD | 1.14±0.01    | 24.93±0.06                       | 76.25±0.93 | 21.71±0.29 |

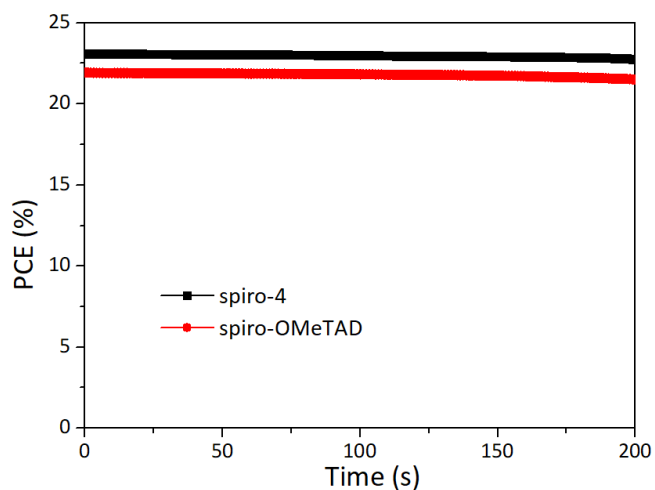

**Fig. S9** Steady-state maximum power output of the device employing spiro-4 or spiro-OMeTAD.

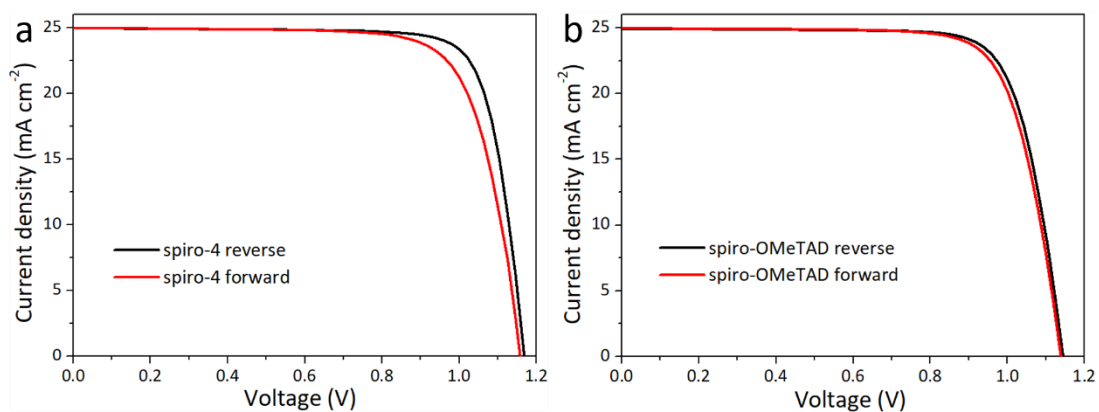

**Fig. S10** *J-V* curves of the devices with spiro-OMeTAD or spiro-4 as HTMs measured from reverse and forward scans.

**Table S3** Photovoltaic parameters of best PSCs with spiro-4 or spiro-OMeTAD and obtained through reverse and forward scans for Fig. S5.

| HTM          | Scan direction | $V_{oc}$ (V) | $J_{sc}$ ( $\text{mA cm}^{-2}$ ) | FF (%) | PCE (%) |
|--------------|----------------|--------------|----------------------------------|--------|---------|
| spiro-4      | reverse        | 1.17         | 24.98                            | 80     | 23.38   |
|              | forward        | 1.16         | 24.96                            | 76     | 21.84   |
| spiro-OMeTAD | reverse        | 1.15         | 24.95                            | 77     | 22.10   |
|              | forward        | 1.14         | 24.97                            | 76     | 21.65   |



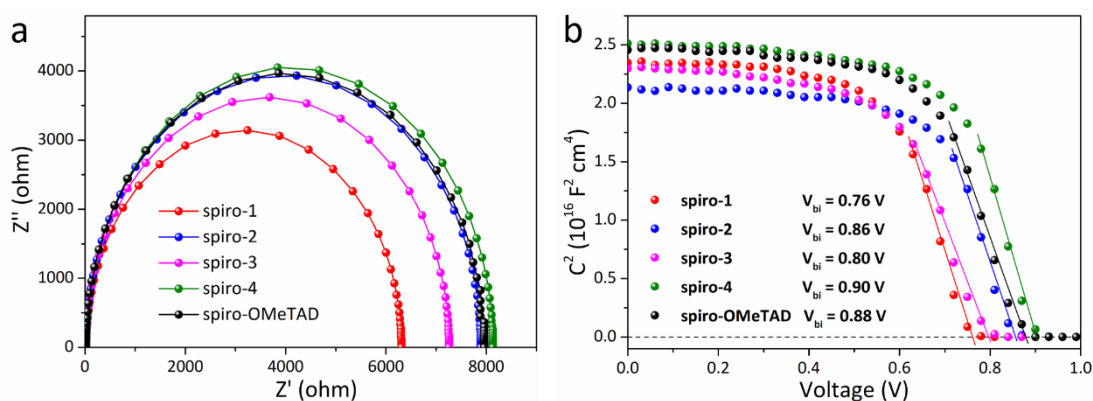

**Fig. S11** (a) Nyquist plots of the EIS test, (b) Mott–Schottky plots of the prepared PSCs with different HTMs.

### Device fabrication

The device fabrication process is mainly done refer to our previous reports.<sup>1,2</sup> In detail, FTO glass plates were sequentially cleaned in soapy water, deionized water and ethanol for 15 min with sonication. Using spray pyrolysis techniques, a precursor solution of 0.7 mL titanium diisopropoxide bis(acetylacetonate) mixed in 14 mL isopropanol was used to deposit the compact  $\text{TiO}_2$  layer at  $500^\circ\text{C}$  on a clean FTO substrate. Mesoporous  $\text{TiO}_2$  layer was created by spin-coating a diluted particle  $\text{TiO}_2$  paste (Dyesol 30NR-T, 1:12 w/w diluted in ethanol) at 3000 rpm for 30s on the previously mentioned substrate. The substrates were then annealed for 30 minutes at a temperature of around  $500^\circ\text{C}$ . The  $\text{Cs}_{0.05}\text{FA}_{0.95}\text{PbI}_3$  perovskite precursor solution includes  $\text{PbI}_2$  (1.53 M), FAI (1.33 M), CsI (0.09 M) and MAI (0.4 M), dissolved in a mixed solvent of DMF and DMSO solution (1000  $\mu\text{L}$ , volume ratio 8:2). The spin-coating process was carried out at 1000 rpm for 10 seconds, and then at 5000 rpm for 30 seconds. During the last 10 seconds of the process, 110  $\mu\text{L}$  of chlorobenzene (CB) is drip-coated onto the rotating substrate. The obtained substrate was immediately heated at  $100^\circ\text{C}$  for 30 min and  $150^\circ\text{C}$  for 10 min on the hotplate. The HTM was then coated on the substrate by spin-coating at 5000 rpm for 30 s. For the dibenzofuran-terminated HTMs, the concentration is  $50 \text{ mg mL}^{-1}$  after preliminary optimization, respectively, which is doped with 20  $\mu\text{L}$  of 4-tert-butylpyridine and 11  $\mu\text{L}$  of lithium bis(trifluoromethylsulfonyl)imide ( $520 \text{ mg mL}^{-1}$  in acetonitrile) and 6  $\mu\text{L}$  tris (2-(1H-pyrazol-1-yl)-4-tert-butyl-pyridine)-cobalt(III) tris (bis (trifluoromethylsulfonyl) imide) ( $300 \text{ mg mL}^{-1}$  in acetonitrile). spiro-OMeTAD (99.8%, HPLC, Xi'an Polymer Light Technology Corp.) were dissolved in chlorobenzene ( $73.5 \text{ mg mL}^{-1}$ ) with 29  $\mu\text{L}$  of 4-tert-butylpyridine and 17  $\mu\text{L}$  of lithium bis(trifluoromethylsulfonyl)imide ( $520 \text{ mg mL}^{-1}$  in acetonitrile) and 8  $\mu\text{L}$  tris (2-(1H-pyrazol-1-yl)-4-tert-butyl-pyridine)-cobalt(III) tris (bis (trifluoromethylsulfonyl) imide) ( $300 \text{ mg mL}^{-1}$  in acetonitrile). Finally, a  $\sim 70 \text{ nm}$  thick Au counter electrode was deposited on top of above film by thermal evaporation. The active area of the device was defined by a black mask with a size of  $0.1225 \text{ cm}^2$  for all measurements.

## Characterization

NMR spectra were obtained using a Brücker spectrometer (500 MHz) with chemical shifts against tetramethylsilane (TMS). A UV-vis spectrophotometer (UV-3600 plus, Shimadzu Co. Ltd., Japan) is used to measure the ultraviolet-visible (UV-vis) spectra of the compounds under investigation. On the fluorescence spectrophotometer, the PL measurements of HTMs were captured (Hitachi F-4600, Japan). The decomposition temperature of the developed materials was measured with a heating rate of  $15^{\circ}\text{C min}^{-1}$  under nitrogen atmosphere (TGA, PerkinElmer, STA-8000). With a scan rate of  $15^{\circ}\text{C min}^{-1}$ , differential scanning calorimetry (DSC) is performed (METTLER-Toledo DSC1). Using a fluorescence spectrometer (FLS980, Edinburgh, UK) with an excitation wavelength of 488 nm, the PL spectrum of perovskite/HTM films was measured. A 3A grade solar simulator (Newport, USA) with an intensity of  $100 \text{ mW cm}^{-2}$  and a Keithley 2400 source meter under AM 1.5G were used to test the J-V characteristics. In addition, repeatedly test JV characteristic of high efficiency device in an independent laboratory (National-Local Joint Engineering Laboratory of New Energy Photoelectric Devices, Hebei University, Baoding, China). On the QE/IPCE measurement kit, the incident photon-to-current conversion efficiency (IPCE) was measured (Sofn Instruments Co, LTD, China). The METATEST E3-300 contact angle tester was used to measure the moisture resistance of HTMs.

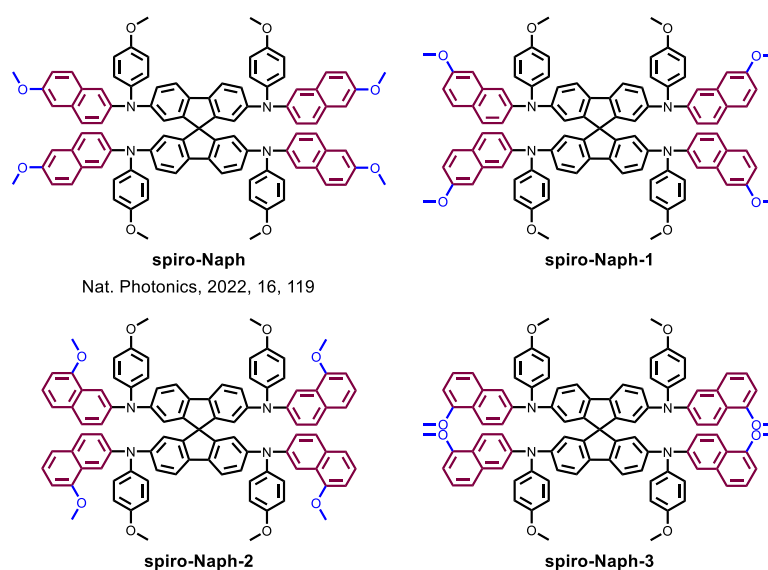

**Fig. S12** Molecular structures of spiro-Naph analogues

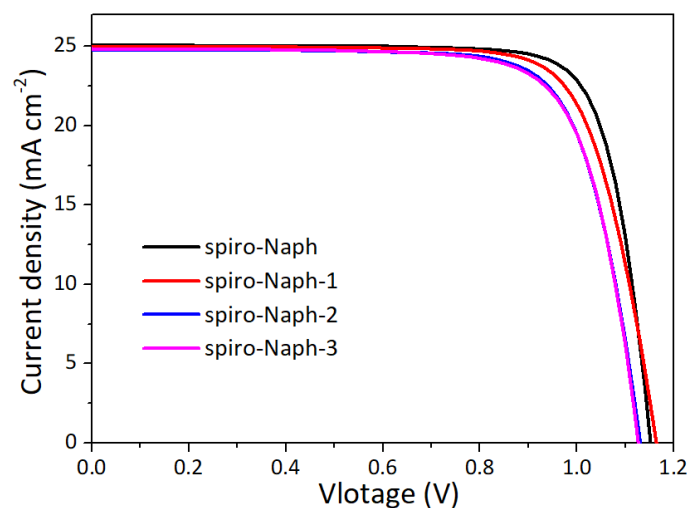

**Fig. S13**  $J$ – $V$  curves of the best-performing PSCs with spiro-Naph, spiro-Naph-1, spiro-Naph-2, or spiro-Naph-3 measured from reverse scans.

**Table S4** Photovoltaic parameters of best-performing PSCs with spiro-Naph, spiro-Naph-1, spiro-Naph-2, or spiro-Naph-3 for Fig. S9.

| HTM          | $V_{oc}$ (V) | $J_{sc}$ ( $\text{mA cm}^{-2}$ ) | FF (%) | PCE (%) |
|--------------|--------------|----------------------------------|--------|---------|
| spiro-Naph   | 1.15         | 25.12                            | 80     | 23.03   |
| spiro-Naph-1 | 1.16         | 25.01                            | 76     | 22.15   |
| spiro-Naph-2 | 1.13         | 24.79                            | 76     | 21.21   |
| spiro-Naph-3 | 1.13         | 24.86                            | 75     | 21.08   |

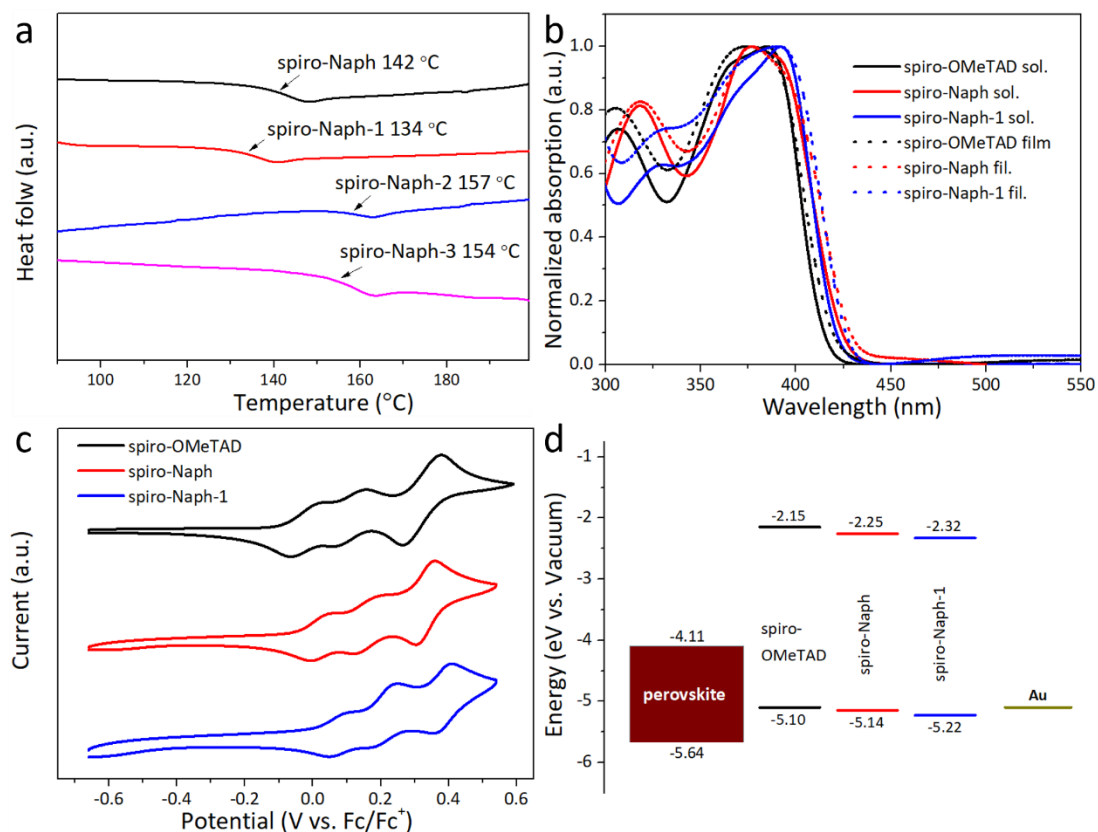

**Fig. S14** (a) DSC curves, (b) UV-Vis absorption spectra in DCM solution or film state, (c) CV curves, (d) energy-level diagram of the device with studied HTMs

**Table S5** Photophysical, electrochemical and thermal properties of spiro-OMeTAD, spiro-Naph, and spiro-Naph-1.

| Molecules    | $\lambda_{\max}$<br>(nm) <sup>a</sup> | $\lambda_{\text{em}}$<br>(nm) <sup>a,b</sup> | $\lambda_{\text{stokes}}$<br>(nm) <sup>a</sup> | $E_g$<br>(eV) <sup>c</sup> | HOMO<br>(eV) | LUMO<br>(eV) <sup>d</sup> | $T_g$<br>(°C) |
|--------------|---------------------------------------|----------------------------------------------|------------------------------------------------|----------------------------|--------------|---------------------------|---------------|
| spiro-OMeTAD | 386                                   | 428                                          | 42                                             | 2.95                       | -5.10        | -2.15                     | 122           |
| spiro-Naph   | 376                                   | 472                                          | 96                                             | 2.89                       | -5.14        | -2.25                     | 142           |
| spiro-Naph-1 | 392                                   | 455                                          | 63                                             | 2.90                       | -5.22        | -2.32                     | 134           |

<sup>a</sup> Measured in dichloromethane solution; <sup>b</sup> Excited at  $\lambda_{\max}$ ; <sup>c</sup> Calculated from the onset of the absorption spectra for solid-state film.

### Synthesis for spiro-2 analogues

Compound 1 and spiro-2 were mainly synthesized according to previous report with an optimized process in our lab.<sup>3-5</sup>

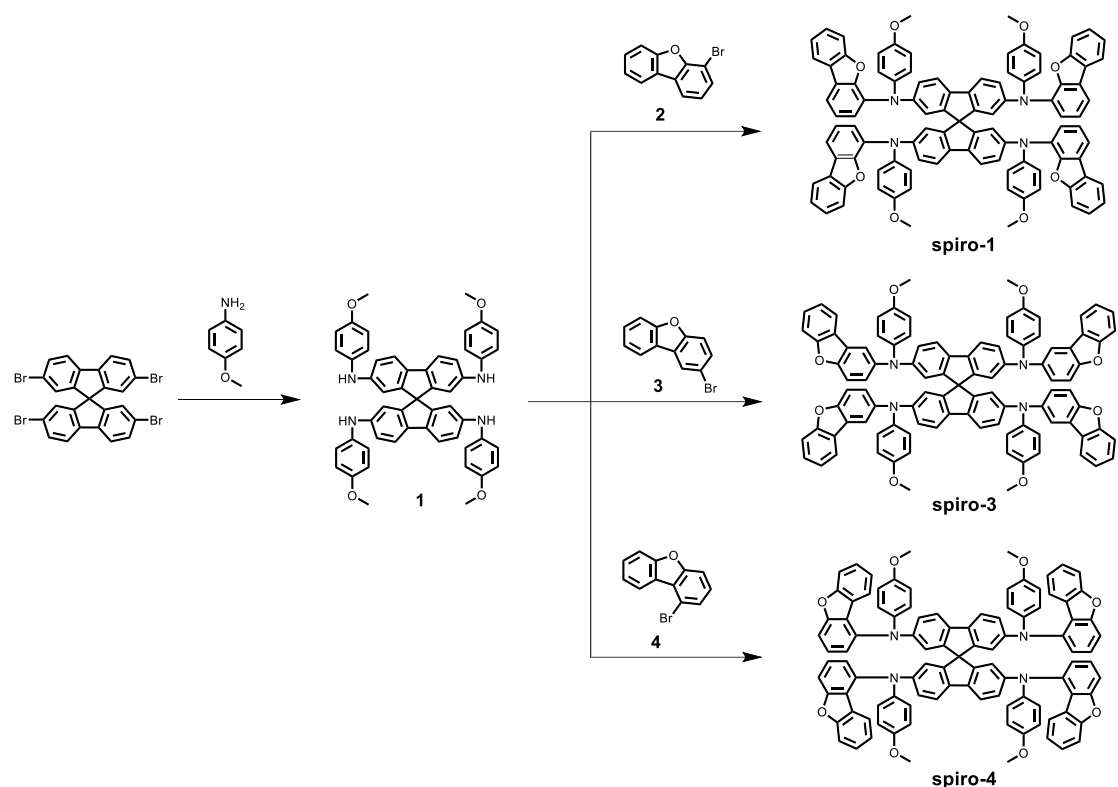

**Scheme S1** Synthesis procedures of spiro-1, spiro-3, and spiro-4.

#### spiro-1

Compound 1 (0.3 mmol, 0.24 g), compound 2 (4-bromodibenzofuran, 1.8 mmol, 480 mg), tri-tert-butylphosphonium tetrafluoroborate (30 mg), and potassium and toluene (20 mL) were added to a 50 mL round-bottomed flask, degassed with nitrogen, Then, tris(dibenzylideneacetone)dipalladium(0) (30 mg) were added to the reaction mixture, then heated to reflux for 48 h with stirring, cooled to room temperature, diluted with 20 mL of dichloromethane. Then, 50 mL of water was added, followed by extracting 4 times with dichloromethane. The obtained organic phases were combined and concentrated by rotary evaporation, and the obtained crude product was purified by column chromatography (dichloromethane : petroleum ether volume ratio = 2:1) to obtain target material which was washed several times with the mixed solvent of ethyl acetate and petroleum ether (98 mg, yield 22%).  $^1\text{H}$  NMR (500 MHz, DMSO)  $\delta$  8.09 (d,  $J = 7.5$  Hz, 4H), 7.91 (d,  $J = 7.7$  Hz, 4H), 7.54 – 7.23 (m, 20H), 7.02 (d,  $J = 7.7$  Hz, 4H), 6.86 (m, 16H), 6.30 (m, 4H), 3.72 (s, 12H).  $^{13}\text{C}$  NMR (100 MHz, DMSO- $d_6$ )  $\delta$  155.97, 155.60, 150.29, 149.80, 147.02, 139.92, 134.96, 131.96, 128.11, 126.11, 125.33, 124.77, 124.41, 123.98, 123.64, 121.66, 121.21, 120.87, 117.60, 116.04, 115.05, 111.97, 65.65, 55.65. HR-MS (MALDI-TOF)  $m/z$  [M-H] calcd. For ( $\text{C}_{101}\text{H}_{68}\text{N}_4\text{O}_8$ ): 1464.5037; found: 1464.5720.

#### spiro-3

Compound 1 (0.3 mmol, 240 mg), compound 3 (2-bromodibenzofuran, 1.8 mmol, 480 mg), potassium tert-butoxide (0.9 g, 8 mmol),  $\text{Pd}(\text{OAc})_2$  (112 mg, 0.5 mmol),  $\text{P}(\text{tBu})_3$

(0.1 M in toluene, 0.5 mL) were added into a 50 mL flask and degassed using Ar. Then 30 mL dry toluene was injected in to the flask and degassed using Ar. The reaction solution was kept with stirring at reflux for 48 h. After cooling to R.T., the mixture was diluted by 30 mL CH<sub>2</sub>Cl<sub>2</sub> and washed with 50 mL deionized water for 3 times. The organic phase was dried by Na<sub>2</sub>SO<sub>4</sub>, and removed solvent using a rotary evaporator. After drying, the solid is purified by column chromatography (dichloromethane) to obtain the product as canary yellow solid which was washed several times with the mixed solvent of ethyl acetate and petroleum ether (231 mg, yield 53%). <sup>1</sup>H NMR (500 MHz, DMSO-d<sub>6</sub>) δ 7.97 (d, *J* = 7.7 Hz, 4H), 7.72 (d, *J* = 2.2 Hz, 4H), 7.65 (d, *J* = 8.3 Hz, 4H), 7.555 – 7.39 (m, 12H), 7.29 (t, *J* = 7.6 Hz, 4H), 7.04 (dd, *J* = 8.8, 2.2 Hz, 4H), 6.90 (m, 16H), 6.72 (dd, *J* = 8.3, 2.0 Hz, 4H), 6.35 (d, *J* = 2.0 Hz, 4H), 3.73 (s, 12H). <sup>13</sup>C NMR (100 MHz, DMSO-d<sub>6</sub>) δ 156.54, 155.97, 152.16, 149.88, 147.73, 143.52, 140.90, 134.55, 128.21, 126.45, 125.07, 123.78, 123.38, 121.68, 121.21, 120.78, 117.15, 115.98, 115.27, 112.83, 112.12, 65.65, 55.63. HR-MS (MALDI-TOF) *m/z* [M-H] calcd. For (C<sub>101</sub>H<sub>68</sub>N<sub>4</sub>O<sub>8</sub>): 1464.5037; found: 1464.5250.

#### **spiro-4**

Compound 1 (0.3 mmol, 0.24 g), compound 4 (1-bromodibenzofuran, 1.8 mmol, 480 mg), tri-tert-butylphosphonium tetrafluoroborate (30 mg), and potassium and toluene (20 mL) were added to a 50 mL round-bottomed flask, degassed with nitrogen, Then, tris(dibenzylideneacetone)dipalladium(0) (30 mg) were added to the reaction mixture, then heated to reflux for 48 h with stirring, cooled to room temperature, diluted with 20 mL of dichloromethane. Then, 50 mL of water was added, followed by extracting 4 times with dichloromethane. The obtained organic phases were combined and concentrated by rotary evaporation, and the obtained crude product was purified by column chromatography (dichloromethane : petroleum ether volume ratio = 2:1) to obtain target material which was washed several times with the mixed solvent of ethyl acetate and petroleum ether (264 mg, yield 60%). <sup>1</sup>H NMR (500 MHz, DMSO) δ 7.51 (m, 12H), 7.34 (d, *J* = 8.3 Hz, 4H), 7.21 (t, *J* = 7.8 Hz, 4H), 7.12 – 6.99 (m, 12H), 6.98 – 6.85 (m, 12H), 6.80 (t, *J* = 7.6 Hz, 4H), 6.64 (d, *J* = 1.9 Hz, 4H), 6.55 (dd, *J* = 8.3, 1.9 Hz, 4H), 3.74 (s, 12H). <sup>13</sup>C NMR (101 MHz, DMSO-d<sub>6</sub>) δ 157.20, 156.29, 155.47, 150.23, 146.93, 142.16, 140.68, 134.90, 128.95, 127.32, 125.77, 123.14, 122.68, 122.23, 121.39, 120.99, 120.62, 118.93, 116.44, 115.22, 111.35, 108.06, 65.45, 55.68. HR-MS (MALDI-TOF) *m/z* [M-H] calcd. For (C<sub>101</sub>H<sub>68</sub>N<sub>4</sub>O<sub>8</sub>): 1464.5037; found: 1464.4872.

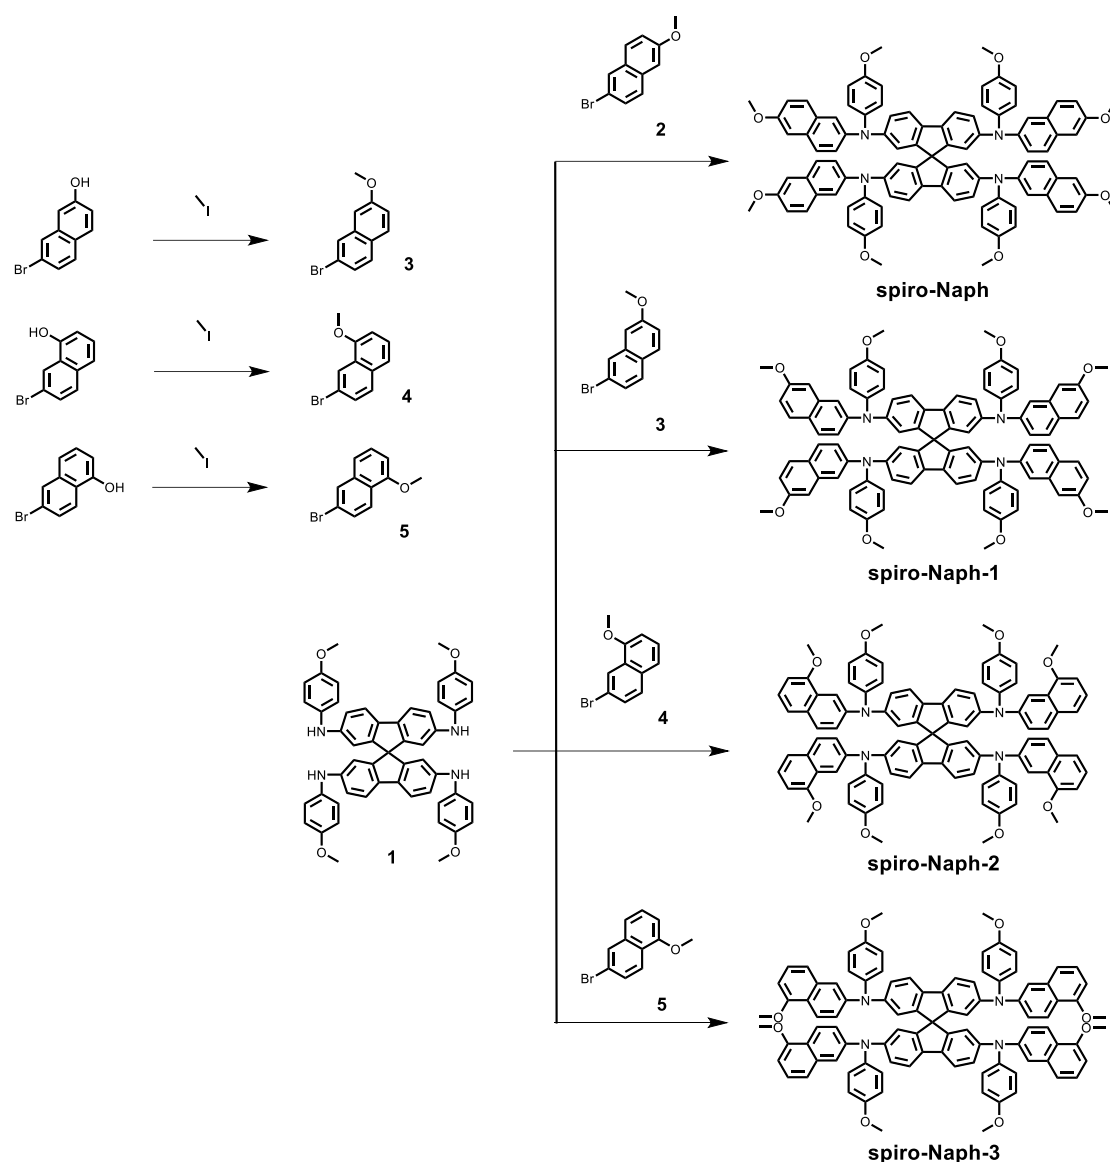

**Scheme S2** Synthesis procedures of spiro-Naph analogues.

### Synthesis of spiro-Naph analogues

**spiro-Naph**<sup>6</sup>(Different synthetic route was used to synthesize it compared with the report)

Compound **1** (0.3 mmol, 240 mg), compound **2** (2-bromo-6-methoxynaphthalene, 1.8 mmol, 430 mg), potassium tert-butoxide (0.9 g, 8 mmol), Pd(OAc)<sub>2</sub> (112 mg, 0.5 mmol), P(tBu)<sub>3</sub> (0.1 M in toluene, 0.5 mL) were added into a 50 mL flask and degassed using Ar. Then 30 mL dry toluene was injected in to the flask and degassed using Ar. The reaction solution was kept with stirring at reflux for 48 h. After cooling to R.T., the mixture was diluted by 30 mL CH<sub>2</sub>Cl<sub>2</sub> and washed with 50 mL deionized water for 3 times. The organic phase was dried by Na<sub>2</sub>SO<sub>4</sub>, and removed solvent using a rotary evaporator. After drying, the solid is purified by column chromatography (CH<sub>2</sub>Cl<sub>2</sub>/PE = 3:1) to obtain the product as canary yellow solid which was washed several times with the mixed solvent of ethyl acetate and petroleum ether (0.33 g). <sup>1</sup>H NMR (500 MHz, DMSO-d<sub>6</sub>) δ 7.67 (d, *J* = 8.9 Hz, 4H), 7.49 (dd, *J* = 17.0, 8.6 Hz, 8H), 7.23 (d, *J* = 22.7 Hz,

8H), 7.06 (t,  $J = 9.5$  Hz, 8H), 6.97 (d,  $J = 8.5$  Hz, 8H), 6.88 (d,  $J = 8.4$  Hz, 8H), 6.78 (d,  $J = 8.3$  Hz, 4H), 6.37 (d,  $J = 1.9$  Hz, 4H), 3.83 (s, 12H), 3.75 (s, 12H). Moreover, the synthesized molecule also exhibits same spectroscopic properties with the reported therein.

### **compound 3**

Under the protection of  $N_2$ ,  $Cs_2CO_3$  (1.5 g) and tetrahydrofuran (20 mL) were added into a 100 mL flask, the reaction mixture was kept with stirring at ice bath. Then, 2-bromo-7-hydroxynaphthalene (1 g, 4.48 mmol) dissolved in *N,N*-dimethylformamide (15 mL) were injected to the flask. After around 1 h, the methyl iodide (1.5 mL) were injected to the flask. The reaction mixture was kept with stirring at R.T. overnight. Then the mixture was poured into cold sodium sulfate aqueous solution, the white solid precipitated. The crude product was filtered to obtain compound 3 (0.95 g).  $^1H$  NMR (500 MHz,  $DMSO-d_6$ )  $\delta$  8.08 (d,  $J = 1.8$  Hz, 1H), 7.85 (d,  $J = 9.0$  Hz, 1H), 7.80 (d,  $J = 8.7$  Hz, 1H), 7.46 (dd,  $J = 8.7, 2.0$  Hz, 1H), 7.33 (d,  $J = 2.5$  Hz, 1H), 7.20 (dd,  $J = 9.0, 2.6$  Hz, 1H), 3.87 (s, 3H).

### **spiro-Naph-1**

spiro-Naph-1 was synthesized following the same procedure to prepare spiro-Naph. Compound 3 (2-bromo-7-methoxynaphthalene, 1.8 mmol, 430 mg) was used instead of compound 2. The crude product is purified by column chromatography ( $CH_2Cl_2/PE = 2:1$ ) to obtain the product as canary yellow solid which was washed several times with the mixed solvent of ethyl acetate and petroleum ether (0.19 g).  $^1H$  NMR (500 MHz,  $DMSO-d_6$ )  $\delta$  7.68 (d,  $J = 9.7$  Hz, 4H), 7.62 (d,  $J = 8.9$  Hz, 4H), 7.55 (d,  $J = 8.3$  Hz, 4H), 7.11 (d,  $J = 1.7$  Hz, 4H), 7.03 – 6.94 (m, 16H), 6.88 (m, 16H), 6.45 (d,  $J = 1.9$  Hz, 4H), 3.75 (s, 12H), 3.71 (s, 12H).  $^{13}C$  NMR (125 MHz,  $DMSO-d_6$ )  $\delta$  158.26, 156.59, 149.77, 146.99, 146.13, 140.20, 135.86, 135.56, 129.42, 128.80, 127.65, 124.84, 123.28, 121.19, 120.29, 117.75, 117.10, 115.44, 105.48, 65.55, 55.66, 55.43.

### **compound 4**

compound 4 was synthesized following the same procedure to prepare compared compound 3. 7-bromo-1-hydroxynaphthalene was used instead of 2-bromo-7-hydroxynaphthalene. The crude product is purified by column chromatography ( $CH_2Cl_2/PE = 2:1$ ) to obtain the product as white solid (0.81 g).  $^1H$  NMR (500 MHz,  $DMSO$ )  $\delta$  8.28 (d,  $J = 1.8$  Hz, 1H), 7.86 (d,  $J = 8.8$  Hz, 1H), 7.65 (dd,  $J = 8.7, 2.0$  Hz, 1H), 7.54 – 7.46 (m, 2H), 7.05 (s, 1H), 3.98 (s, 3H).

### **spiro-Naph-2**

spiro-Naph-2 was synthesized following the same procedure to prepare spiro-Naph. Compound 4 (2-bromo-7-methoxynaphthalene, 1.8 mmol, 430 mg) was used instead of compound 2. The crude product is purified by column chromatography ( $CH_2Cl_2/PE = 2:1$ ) to obtain the product as canary yellow solid which was washed several times with the mixed solvent of ethyl acetate and petroleum ether (0.28 g).  $^1H$  NMR (500 MHz,  $DMSO$ )  $\delta$  7.69 (d,  $J = 9.0$  Hz, 4H), 7.54 (d,  $J = 8.3$  Hz, 4H), 7.49 (d,  $J = 2.1$  Hz, 4H),



7.38 (d,  $J = 8.3$  Hz, 4H), 7.28 (t,  $J = 7.9$  Hz, 4H), 7.08 (dd,  $J = 8.9, 2.3$  Hz, 4H), 6.97 (d,  $J = 8.9$  Hz, 8H), 6.92 – 6.83 (m, 16H), 6.37 (d,  $J = 2.0$  Hz, 4H), 3.79 (s, 12H), 3.76 (s, 12H).  $^{13}\text{C}$  NMR (126 MHz, DMSO)  $\delta$  156.38, 154.23, 149.80, 147.18, 145.25, 140.45, 135.46, 130.46, 128.88, 127.24, 126.19, 124.94, 123.54, 123.19, 121.19, 120.21, 117.63, 115.42, 112.89, 105.35, 65.50, 55.76, 55.61.

### **compound 5**

compound 5 was synthesized following the same procedure to prepare compared compound 3. 6-bromo-1-hydroxynaphthalene was used instead of 2-bromo-7-hydroxynaphthalene. The crude product is purified by column chromatography ( $\text{CH}_2\text{Cl}_2/\text{PE} = 2:1$ ) to obtain the product as white solid (0.83 g).  $^1\text{H}$  NMR (500 MHz, DMSO)  $\delta$  8.16 (d,  $J = 2.0$  Hz, 1H), 8.08 (d,  $J = 9.0$  Hz, 1H), 7.60 (dd,  $J = 9.0, 2.0$  Hz, 1H), 7.52 – 7.44 (m, 2H), 7.02 (dd,  $J = 7.1, 1.5$  Hz, 1H), 3.97 (s, 3H).

### **spiro-Naph-3**

spiro-Naph-3 was synthesized following the same procedure to prepare spiro-Naph. Compound 5 (2-bromo-7-methoxynaphthalene, 1.8 mmol, 430 mg) was used instead of compound 2.

The crude product is purified by column chromatography ( $\text{CH}_2\text{Cl}_2/\text{PE} = 2:1$ ) to obtain the product as canary yellow solid which was washed several times with the mixed solvent of ethyl acetate and petroleum ether (0.31 g).  $^1\text{H}$  NMR (500 MHz, DMSO)  $\delta$  7.97 (d,  $J = 9.1$  Hz, 4H), 7.52 (d,  $J = 8.3$  Hz, 4H), 7.28 (t,  $J = 8.0$  Hz, 4H), 7.10 (m, 8H), 7.06 – 6.97 (m, 12H), 6.92 (d,  $J = 9.0$  Hz, 8H), 6.86 – 6.77 (m, 8H), 6.45 (d,  $J = 2.0$  Hz, 4H), 3.94 (s, 12H), 3.76 (s, 12H).  $^{13}\text{C}$  NMR (126 MHz, DMSO)  $\delta$  156.58, 155.32, 149.67, 146.81, 146.14, 140.08, 135.62, 127.57, 127.33, 123.51, 122.83, 121.59, 121.14, 121.07, 120.84, 119.25, 117.75, 117.38, 115.39, 103.24, 65.33, 55.72, 55.58.

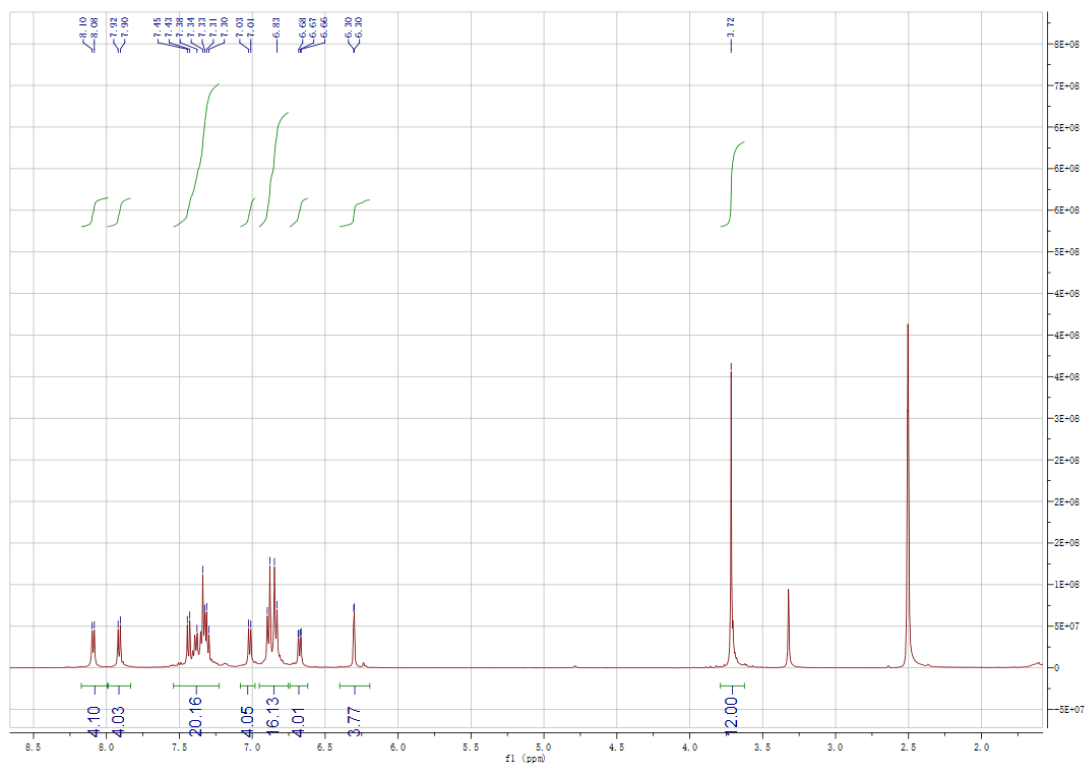

Fig. S15  $^1\text{H}$  NMR of spiro-1.

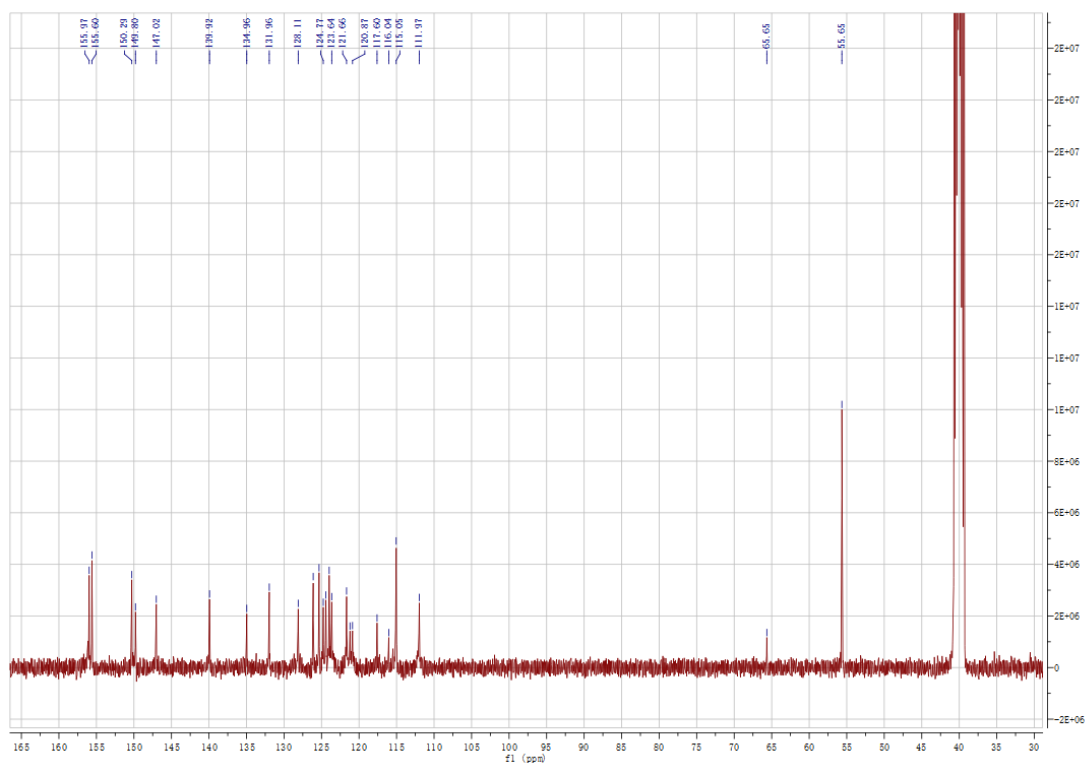

Fig. S16  $^{13}\text{C}$  NMR of spiro-1.

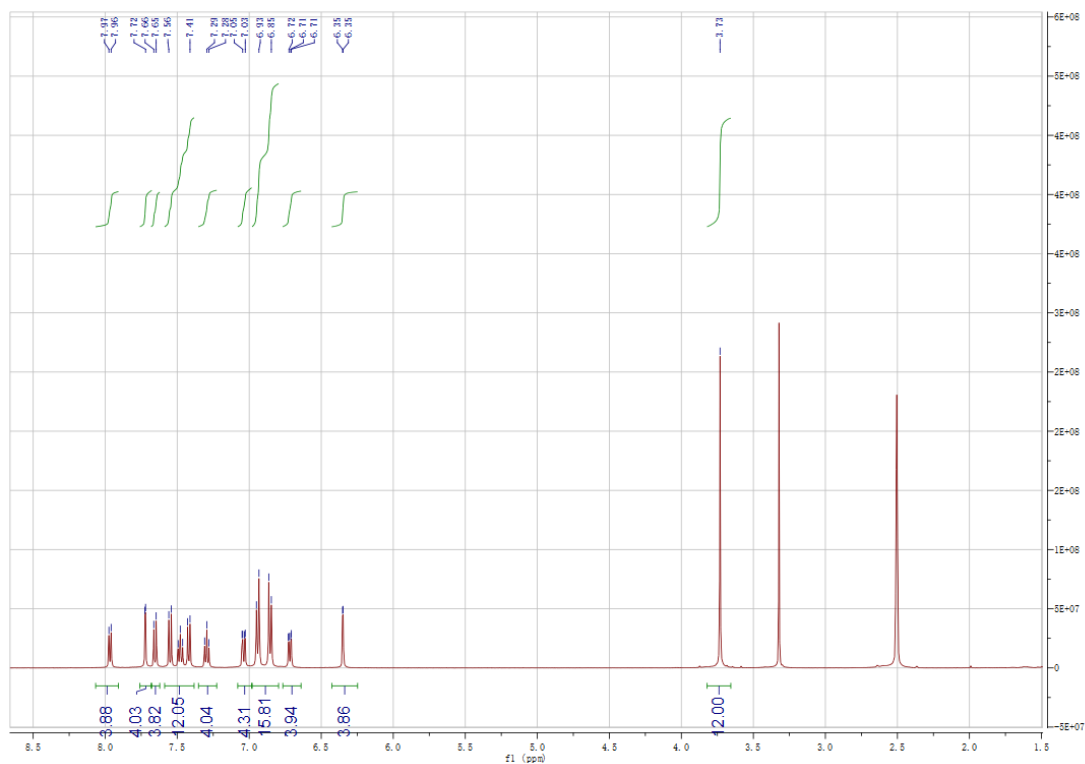

Fig. S17  $^1\text{H}$  NMR of spiro-3.

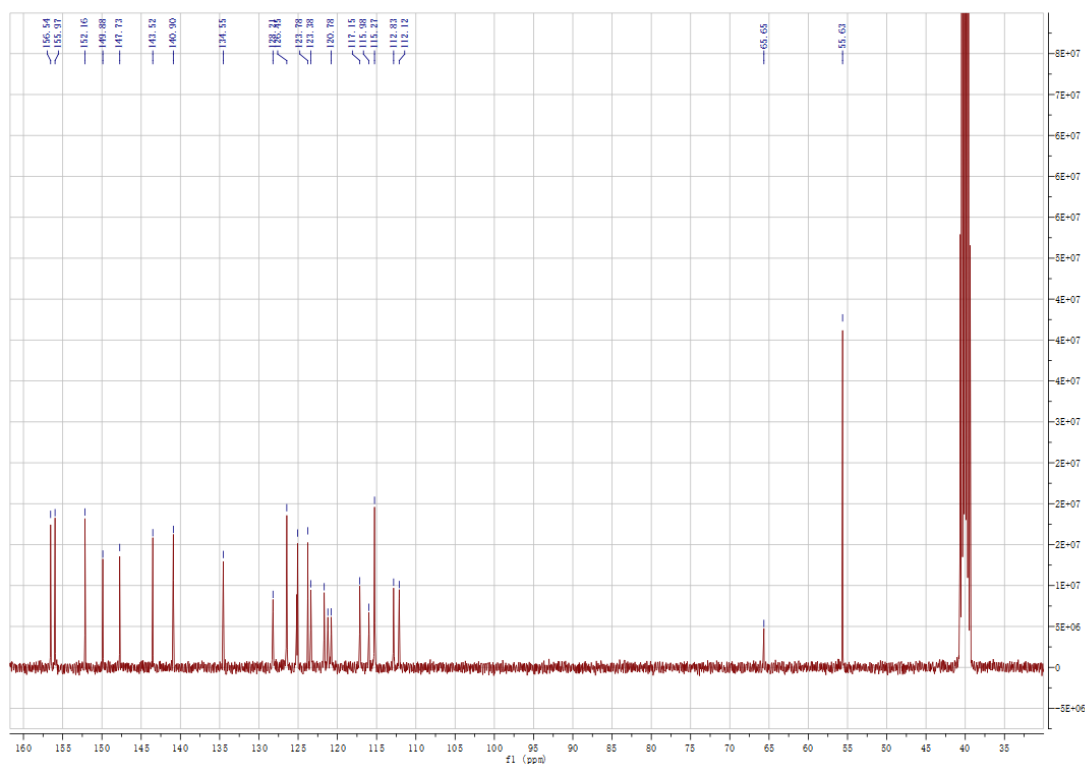

Fig. S18  $^{13}\text{C}$  NMR of spiro-3.

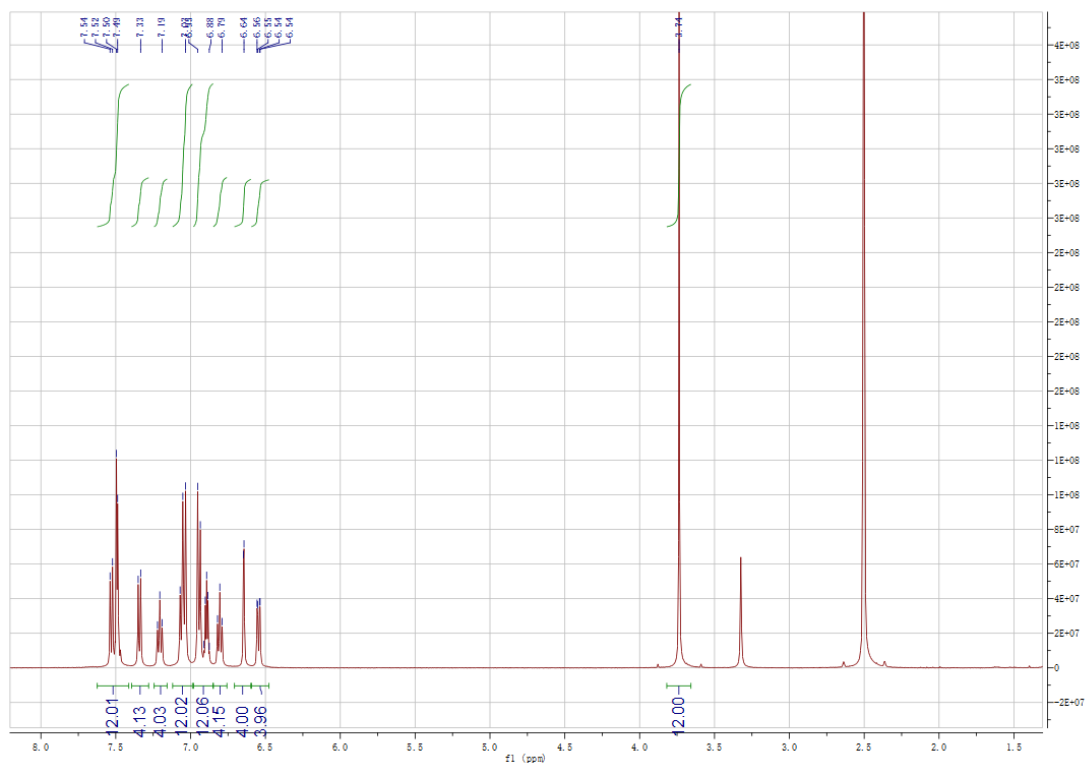

Fig. S19  $^1\text{H}$  NMR of spiro-4.

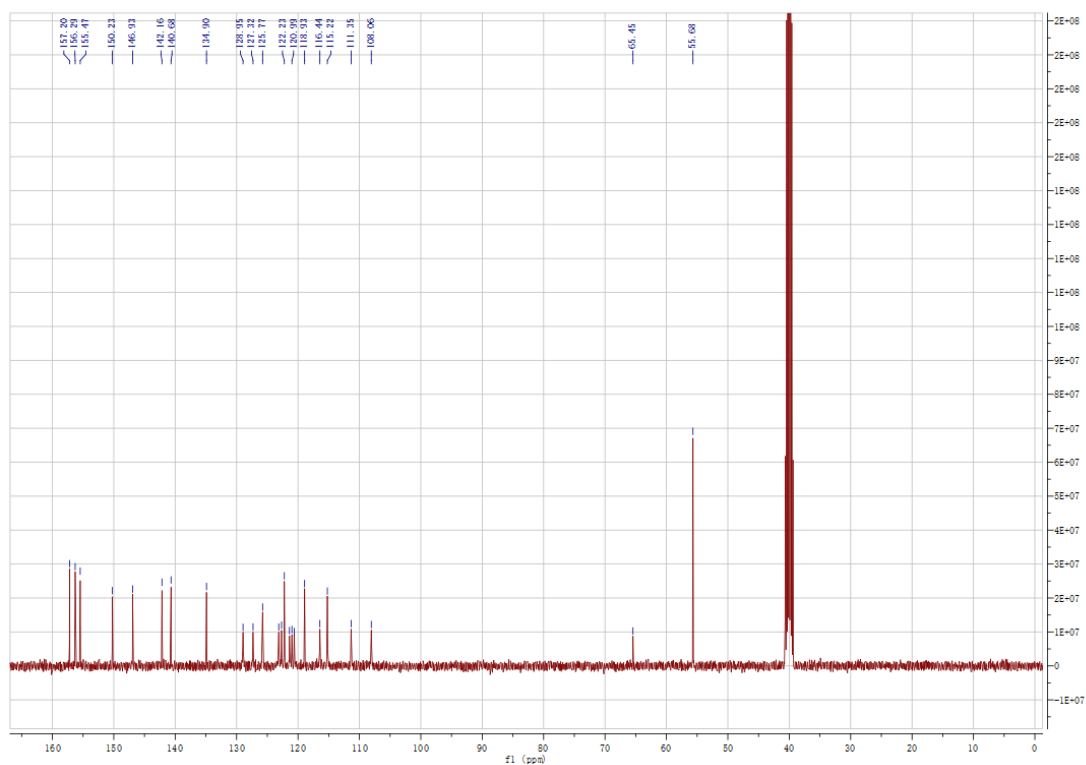

Fig. S20  $^{13}\text{C}$  NMR of spiro-4.

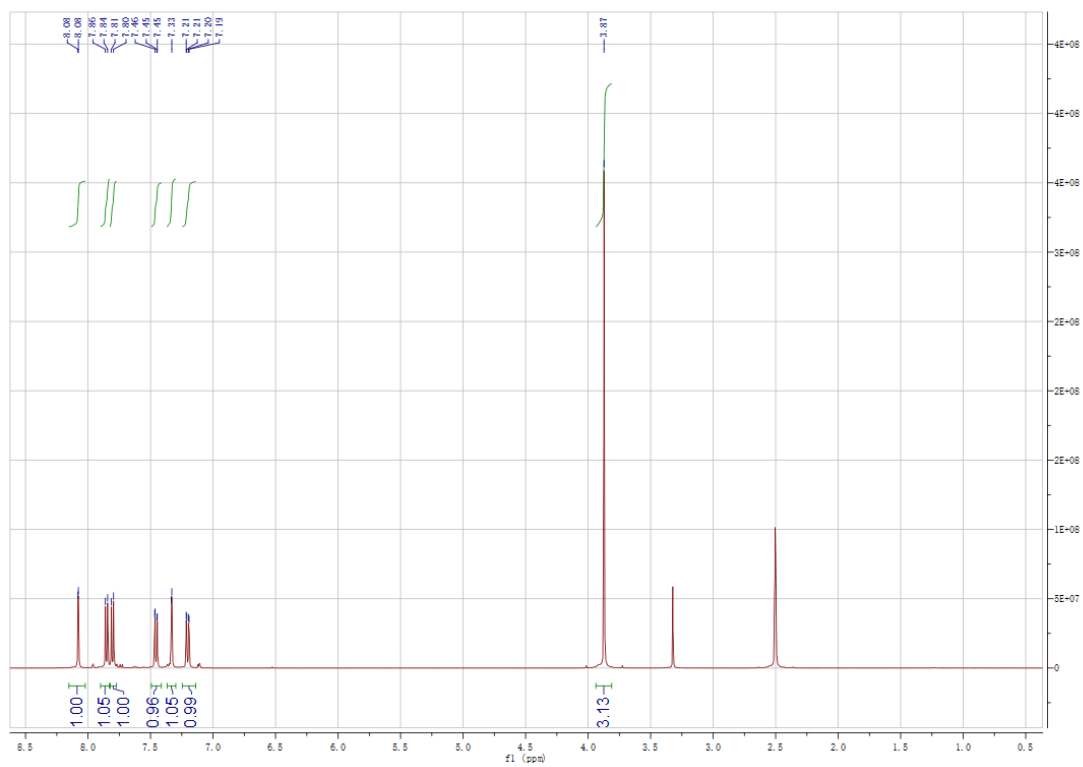

Fig. S21  $^1\text{H}$  NMR of compound 3.

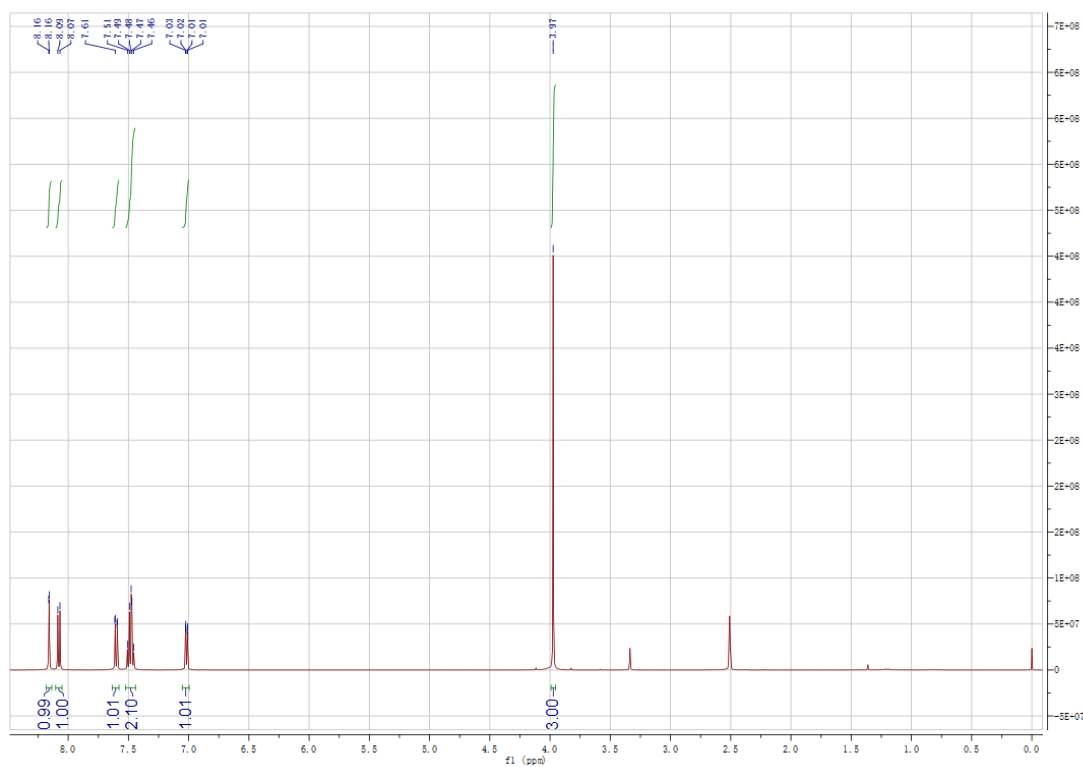

Fig. S22  $^1\text{H}$  NMR of compound 4.

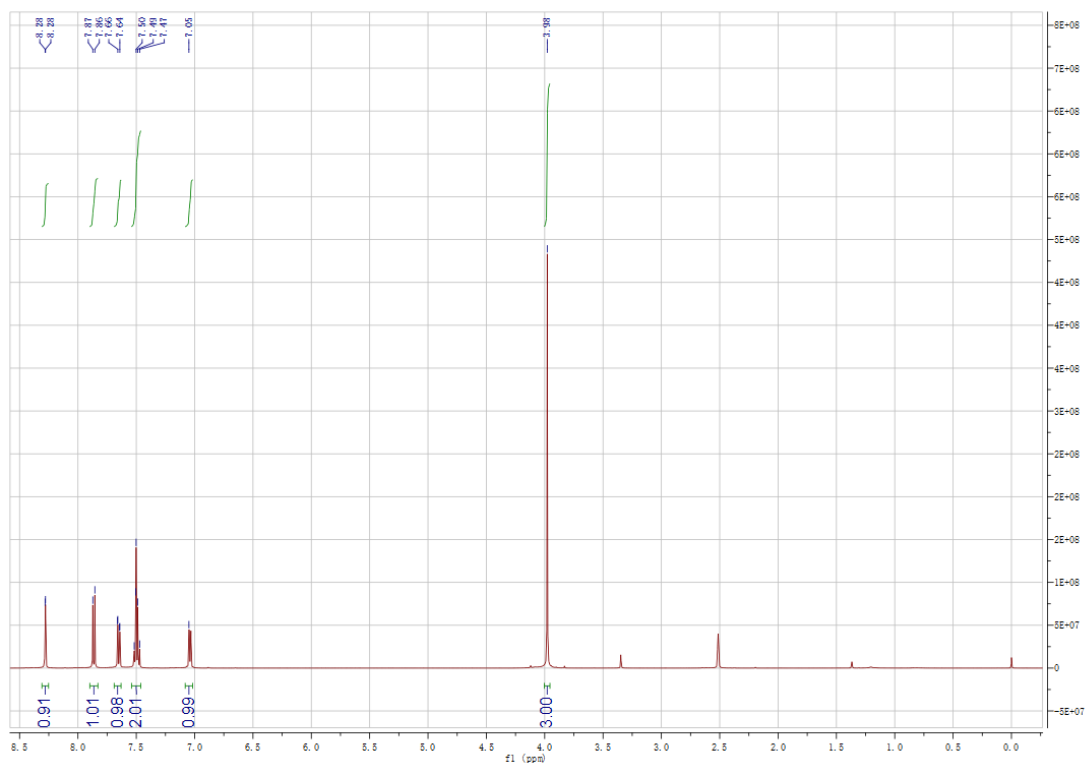

Fig. S23  $^1\text{H}$  NMR of compound 5.

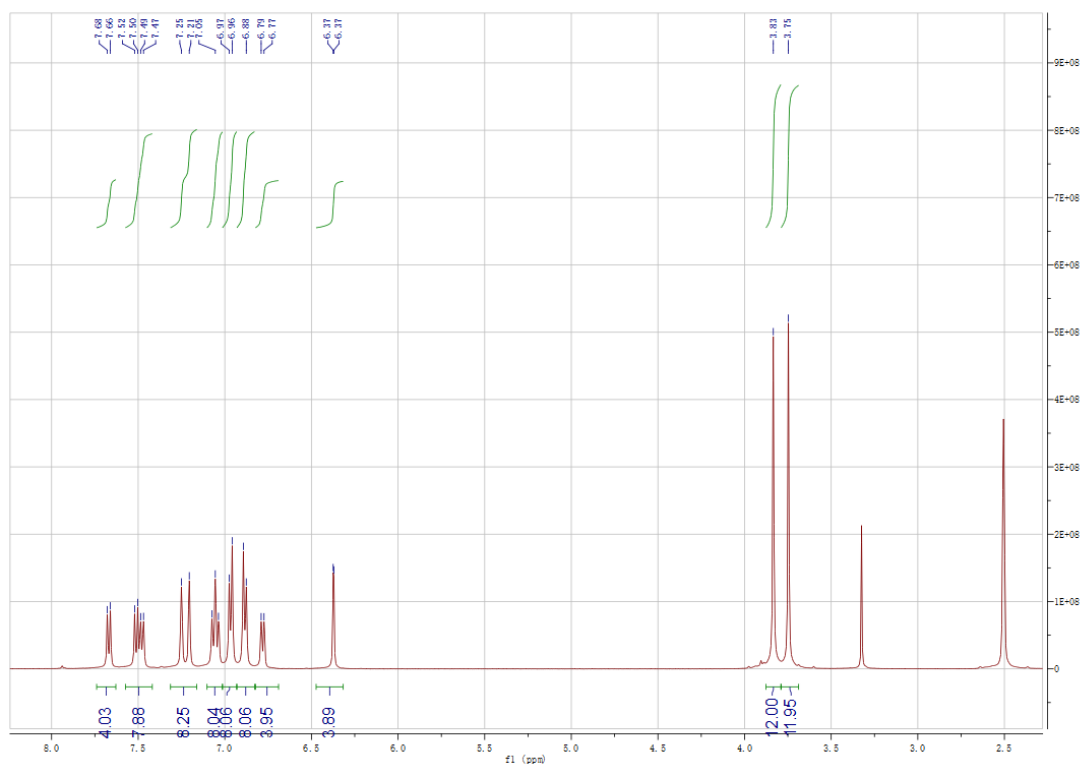

Fig. S24  $^1\text{H}$  NMR of spiro-Naph.



Fig. S25  $^1\text{H}$  NMR of compound 3.

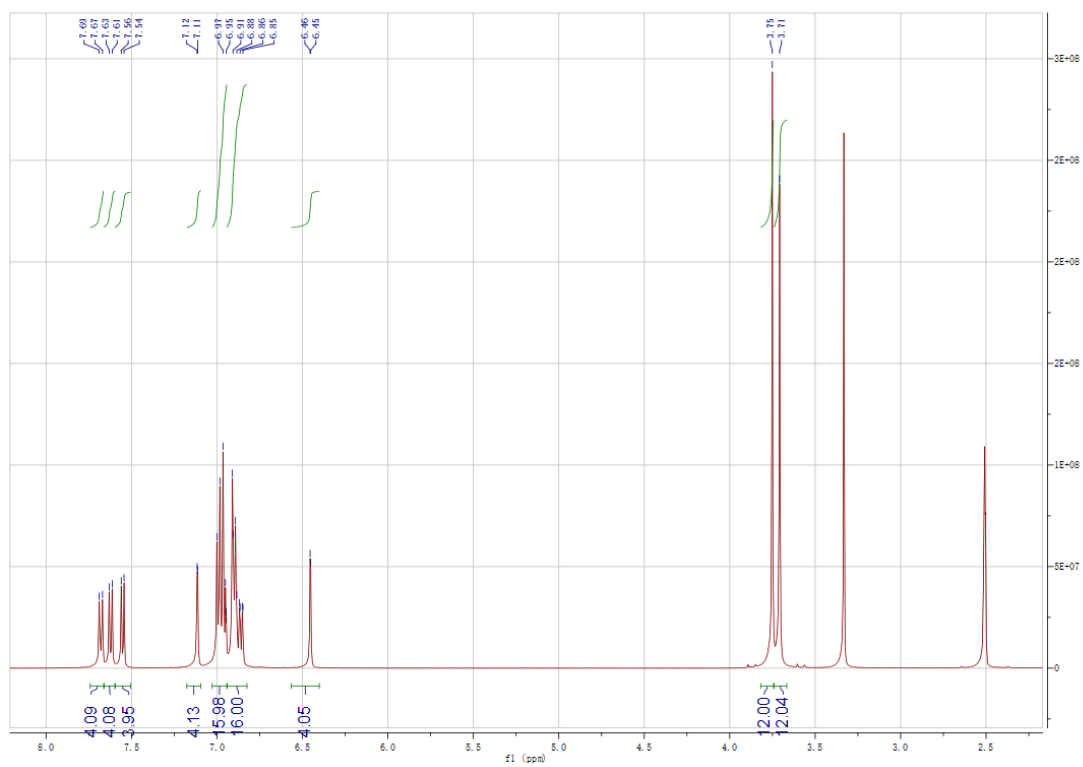

Fig. S26  $^1\text{H}$  NMR of spiro-Naph-1.

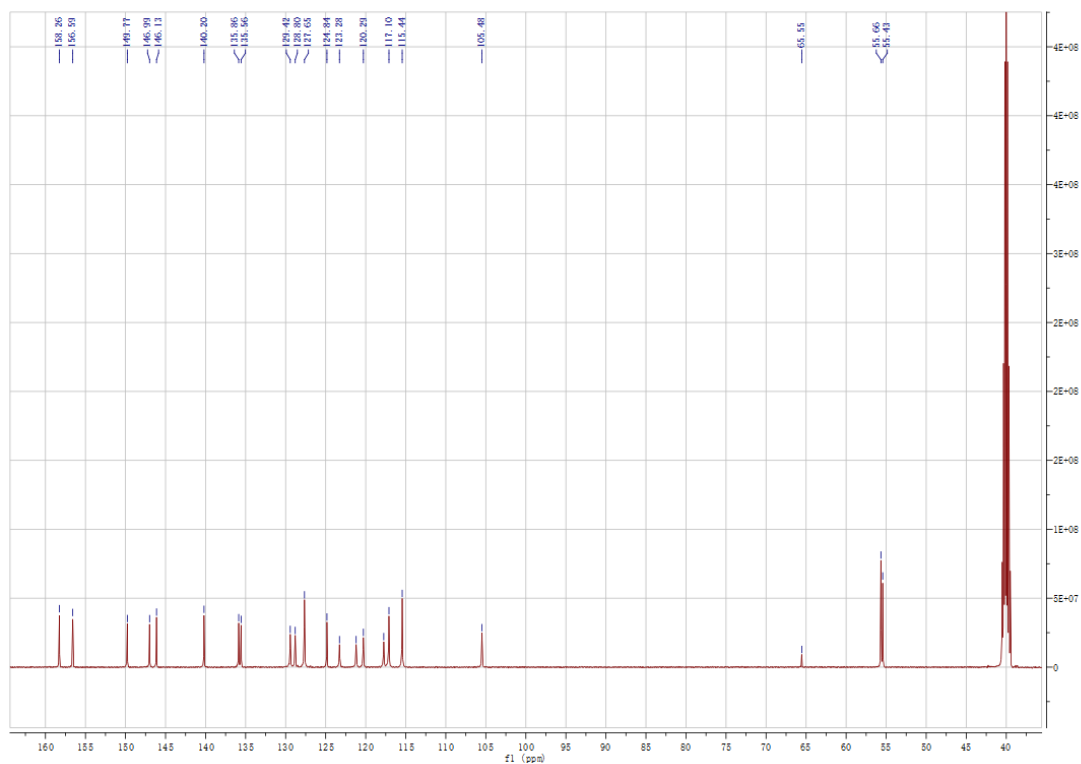

Fig. S27  $^{13}\text{C}$  NMR of spiro-Naph-1.

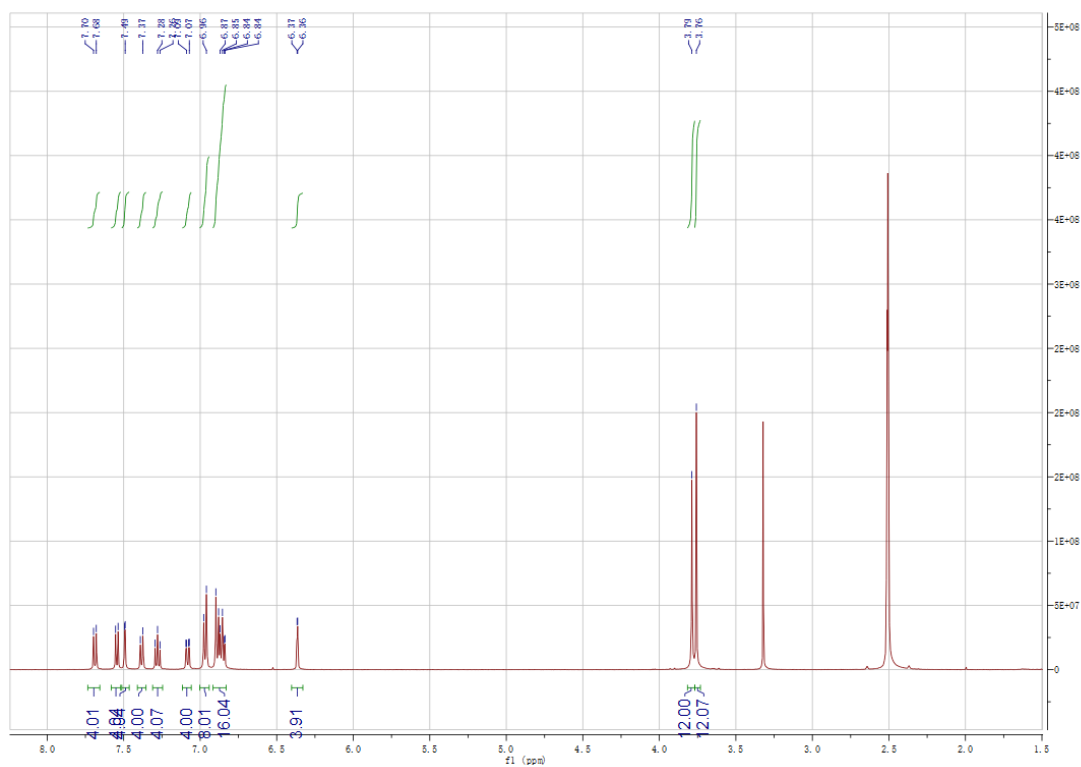

Fig. S28  $^1\text{H}$  NMR of spiro-Naph-2.



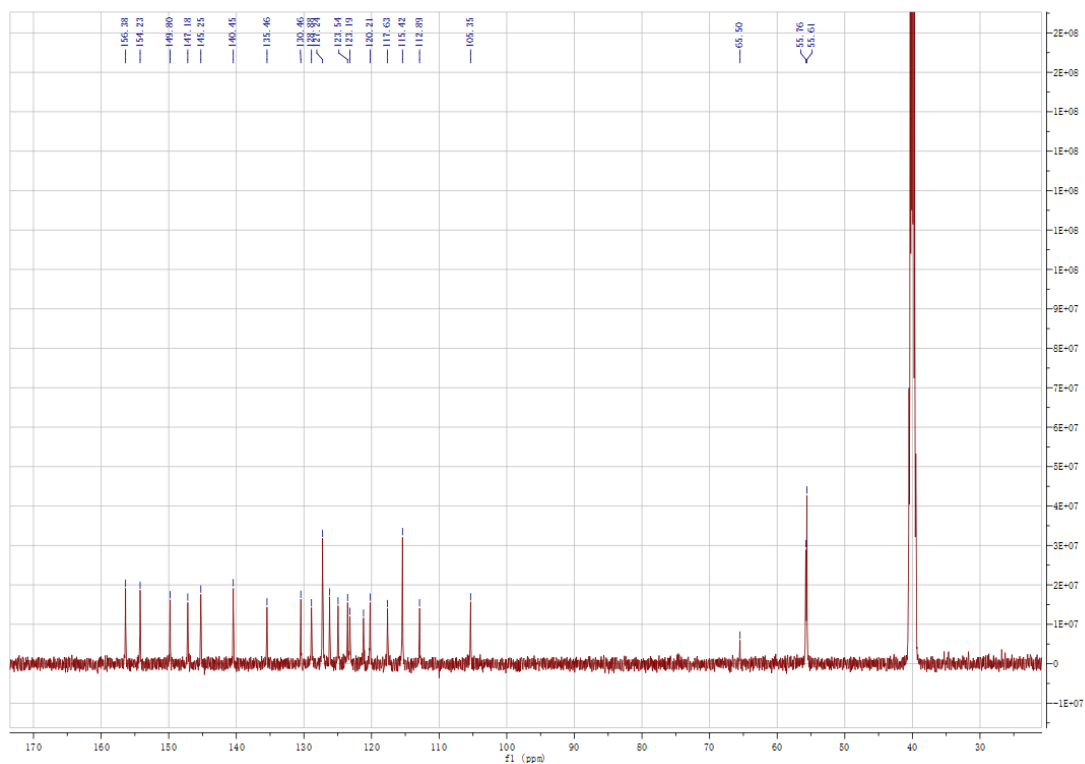

Fig. S29  $^{13}\text{C}$  NMR of spiro-Naph-2.

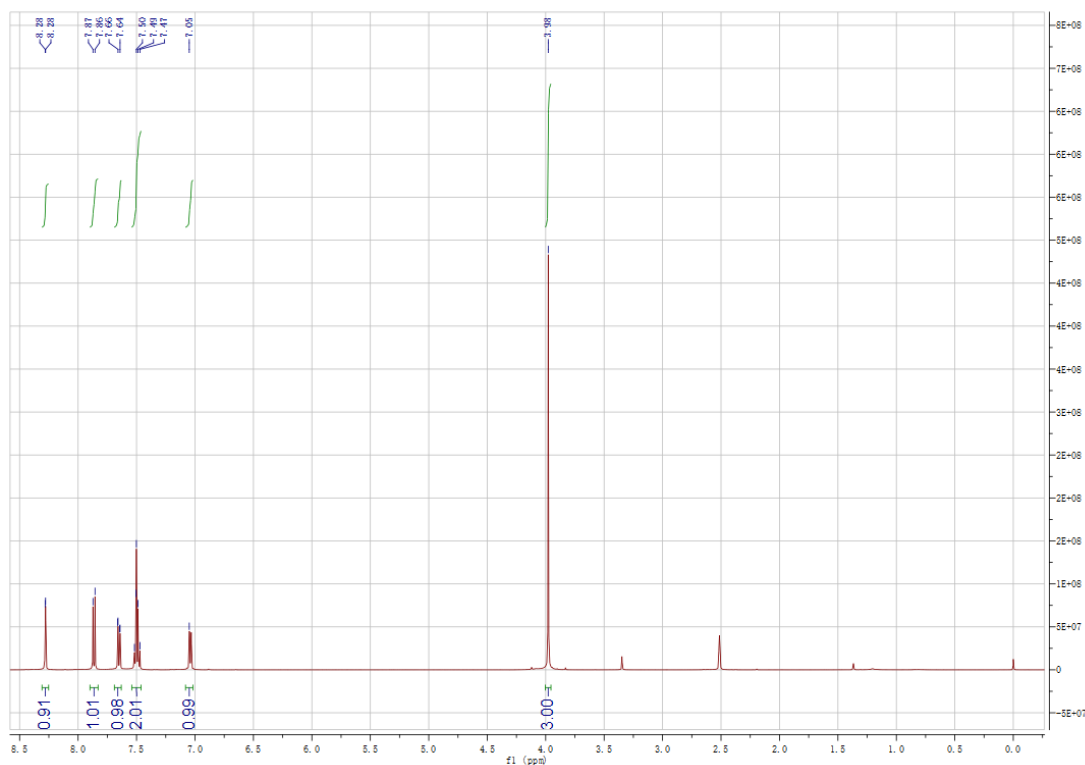

Fig. S30  $^1\text{H}$  NMR of compound 5.

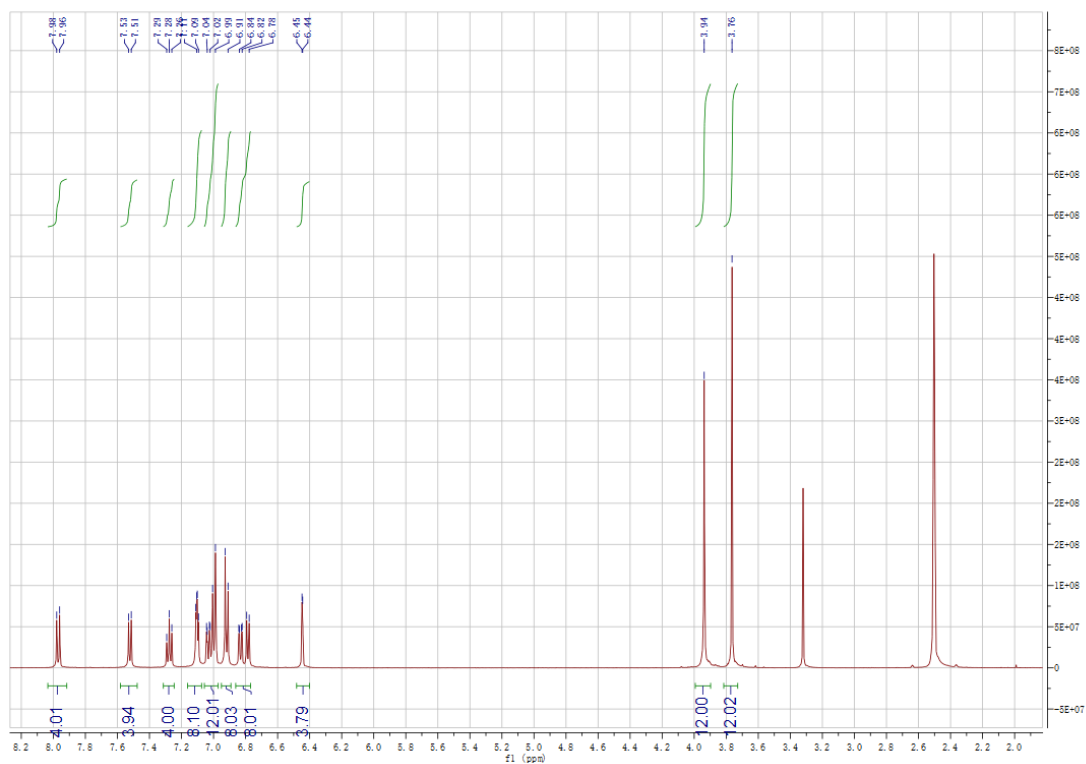

Fig. S31  $^1\text{H}$  NMR of spiro-Naph-3.

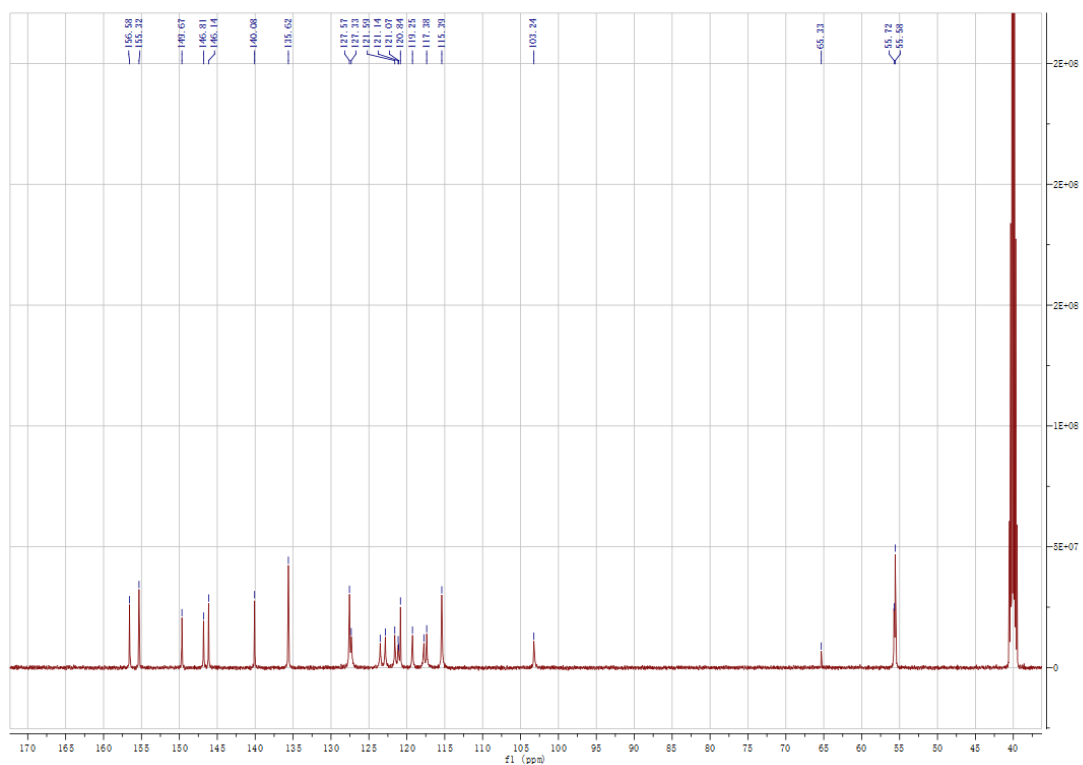

Fig. S32  $^{13}\text{C}$  NMR of spiro-Naph-3.

Reference

1. Y. Zhou, X. F. Zhang, M. Y. Han, N. Wu, J. L. Chen, G. Rahim, Y. H. Wu, S. Y. Dai and X. P. Liu, *Sol. Energy Mater. Sol. Cells*, 2023, **257**, 112375.
2. M. Y. Han, Y. P. Liang, J. L. Chen, X. F. Zhang, R. Ghadari, X. P. Liu, N. Wu, Y. Wang, Y. Zhou, Y. Ding, M. L. Cai, H. B. Chen and S. Y. Dai, *ChemSusChem*, 2022, **15**, e202201485.
3. N. J. Jeon, H. Na, E. H. Jung, T.-Y. Yang, Y. G. Lee, G. Kim, H.-W. Shin, S. Il Seok, J. Lee and J. Seo, *Nature Energy*, 2018, **3**, 682-689.
4. X. Zhang, X. Liu, N. Wu, R. Ghadari, M. Han, Y. Wang, Y. Ding, M. Cai, Z. Qu and S. Dai, *J. Energy Chem.*, 2022, **67**, 19-26.
5. Y. P. Liang, J. L. Chen, X. F. Zhang, M. Y. Han, R. Ghadari, N. Wu, Y. Wang, Y. Zhou, X. P. Liu and S. Y. Dai, *J. Mater. Chem. C*, 2022, **10**, 10988-10994.
6. M. Jeong, I. W. Choi, K. Yim, S. Jeong, M. Kim, S. J. Choi, Y. Cho, J.-H. An, H.-B. Kim, Y. Jo, S.-H. Kang, J.-H. Bae, C.-W. Lee, D. S. Kim and C. Yang, *Nature Photonics*, 2022, **16**, 119-125.
